# Supplementary material for: Rotational spectroscopy of hydrogen-bonded binary trifluoro-propanol conformers: conformational diversity, preference and abundances in a jet expansion
Source: Royal Society of Chemistry journal article supplement (doi:10.1039/d3cp01035j), 2023-01-01
Supplement: d3cp01035j1.pdf [file d3cp01035j1.pdf]

**Rotational spectroscopy of hydrogen-bonded binary trifluoropropanol conformers: conformational diversity, preference and abundances in a jet expansion**

Alex N. Mort,<sup>a</sup> Fan Xie,<sup>a,b</sup> Arsh S. Hazrah,<sup>a</sup> and Yunjie Xu<sup>a\*</sup>

<sup>a</sup>*Department of Chemistry, University of Alberta, 11227 Saskatchewan Drive, Edmonton, AB, Canada.*

<sup>b</sup>*Present address: Deutsches Elektronen-Synchrotron (DESY), Notkestraße 85, 22607 Hamburg, Germany.*

\* Corresponding Author, Email: [yunjie.xu@ualberta.ca](mailto:yunjie.xu@ualberta.ca), Fax: 1-780-492-8231

**Contents**

|                                                                                                                 |        |
|-----------------------------------------------------------------------------------------------------------------|--------|
| <b>Figure S1.</b> The nine conformations of the TFP monomer and an example binary TFP conformer.....            | S2     |
| <b>Figure S2.</b> A zoom-in section of the Q-branch transitions of Dimer <b>6</b> .....                         | S2     |
| <b>Table S1.</b> Spectroscopic properties of the predicted binary TFP conformers.....                           | S3-S4  |
| <b>Table S2-S6.</b> Rotational transition frequencies of the five binary TFP conformers assigned.....           | S4-S24 |
| <b>Table S7.</b> Comparison of the experimental and theoretical rotational constants and planar moments.....    | S24    |
| <b>Table S8.</b> Predicted quartic centrifugal distortion constants of the five observed binary conformers..... | S24    |
| <b>Table S9.</b> The binding energies of the selective binary TFP conformers.....                               | S25    |

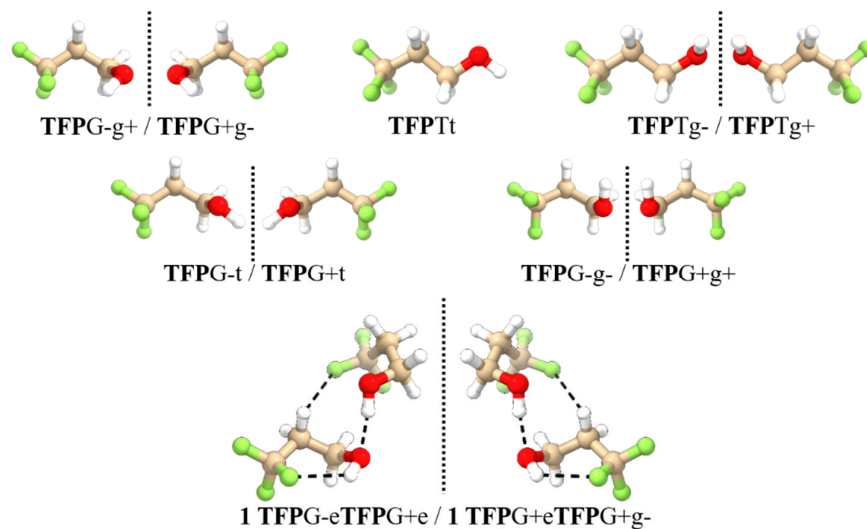

**Figure S1.** The geometries of nine monomeric conformations of TFP and an example TFP dimer. The mirror-imaged pairs are separated by the dotted lines.

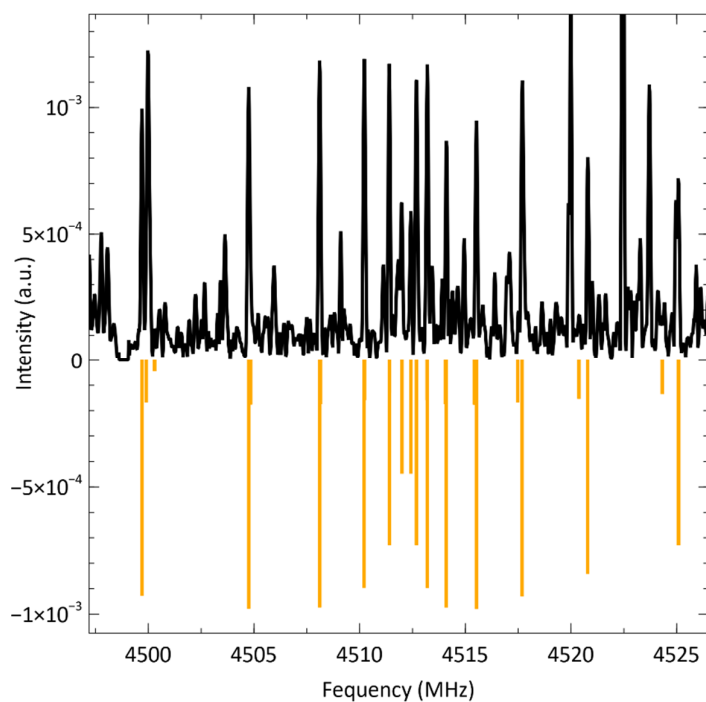

**Figure S2.** A zoom-in experimental section (top) centring on the Q branch transitions of Dimer **6** to show the signal-to-noise ratio achieved and the corresponding simulated spectrum (bottom). See the main text for the simulation details. Please note that the transitions of Dimer **6** are among the weakest ones assigned.

**Table S1.** The rotational constants (in MHz), permanent dipole components (in Debye), and the zero-point-energy corrected relative energies,  $\Delta E$  (in kJ mol<sup>-1</sup>), of the binary TFP conformers, calculated at the B3LYP-D3BJ/def2-TZVP level.

| Dimer <sup>a</sup> | <i>A</i> | <i>B</i> | <i>C</i> | $\mu_a$ | $\mu_b$ | $\mu_c$ | $\Delta E^{\text{ZPE}}$ |
|--------------------|----------|----------|----------|---------|---------|---------|-------------------------|
| Dimer 1            | 1113     | 283      | 265      | 1.0     | -0.8    | 1.1     | 0.0                     |
| Dimer 2            | 1014     | 308      | 274      | 0.0     | 0.3     | -0.1    | 0.3                     |
| Dimer 3            | 1013     | 315      | 287      | 0.0     | -2.2    | 0.7     | 0.4                     |
| Dimer 4            | 1083     | 319      | 314      | 1.5     | -0.5    | 0.8     | 1.5                     |
| Dimer 5            | 972      | 380      | 316      | -0.4    | -1.7    | 0.2     | 1.6                     |
| Dimer 6            | 1168     | 265      | 256      | -0.5    | -1.0    | 2.4     | 1.7                     |
| Dimer 7            | 943      | 380      | 317      | 0.5     | -1.1    | 2.3     | 1.8                     |
| Dimer 8            | 1034     | 334      | 287      | 0.4     | -1.4    | -2.2    | 2.0                     |
| Dimer 9            | 1235     | 258      | 251      | 1.2     | 0.5     | -0.6    | 2.2                     |
| Dimer 10           | 1055     | 336      | 287      | -0.2    | -1.3    | 0.1     | 2.4                     |
| Dimer 11           | 908      | 390      | 318      | -1.1    | -1.8    | -0.6    | 3.3                     |
| Dimer 12           | 1223     | 245      | 234      | -2.7    | -0.3    | 1.2     | 3.9                     |
| Dimer 13           | 1051     | 288      | 254      | 0.7     | -0.8    | -1.4    | 3.9                     |
| Dimer 14           | 1590     | 159      | 155      | -2.5    | -1.1    | -1.1    | 3.9                     |
| Dimer 15           | 1107     | 252      | 244      | -2.3    | -0.1    | -0.3    | 3.9                     |
| Dimer 16           | 862      | 323      | 264      | 2.0     | -1.0    | 0.7     | 4.3                     |
| Dimer 17           | 1764     | 165      | 163      | -2.2    | -1.2    | -0.9    | 4.3                     |
| Dimer 18           | 1068     | 239      | 215      | 3.4     | -1.6    | 0.7     | 4.3                     |
| Dimer 19           | 1658     | 174      | 170      | 2.0     | -1.5    | 0.7     | 4.3                     |
| Dimer 20           | 891      | 404      | 319      | 1.6     | -2.1    | -1.3    | 4.5                     |
| Dimer 21           | 1465     | 203      | 198      | -1.4    | 1.3     | -0.1    | 4.6                     |
| Dimer 22           | 945      | 286      | 249      | 3.3     | -1.3    | -0.1    | 4.7                     |
| Dimer 23           | 1124     | 232      | 218      | 3.0     | -2.0    | -0.3    | 4.7                     |
| Dimer 24           | 1114     | 332      | 316      | -0.1    | -2.1    | 0.7     | 4.7                     |
| Dimer 25           | 1030     | 271      | 259      | 1.0     | 0.8     | -0.5    | 5.1                     |
| Dimer 26           | 1196     | 283      | 274      | 0.6     | -1.6    | 1.5     | 5.2                     |
| Dimer 27           | 1142     | 241      | 223      | 1.1     | 0.6     | -0.5    | 5.5                     |
| Dimer 28           | 886      | 301      | 257      | 1.7     | -0.1    | 1.9     | 5.7                     |
| Dimer 29           | 1181     | 237      | 217      | 2.2     | 0.2     | -1.8    | 6.5                     |
| Dimer 30           | 973      | 345      | 338      | -0.1    | 1.8     | -1.3    | 6.7                     |
| Dimer 31           | 1801     | 136      | 134      | -3.0    | 0.1     | 0.9     | 6.9                     |
| Dimer 32           | 1119     | 200      | 184      | 2.6     | -0.2    | -0.9    | 7.0                     |
| Dimer 33           | 977      | 321      | 270      | -0.6    | -2.1    | -2.2    | 7.1                     |
| Dimer 34           | 944      | 311      | 279      | -0.9    | -3.0    | -0.2    | 7.2                     |
| Dimer 35           | 1042     | 333      | 327      | 2.2     | 2.0     | -0.9    | 7.3                     |
| Dimer 36           | 1185     | 261      | 239      | 2.1     | 1.0     | 0.8     | 8.2                     |
| Dimer 37           | 1220     | 249      | 230      | -1.9    | 1.1     | 3.2     | 8.4                     |
| Dimer 38           | 1067     | 273      | 240      | 1.6     | -2.5    | 3.0     | 8.4                     |
| Dimer 39           | 918      | 396      | 326      | -2.2    | -3.5    | 0.4     | 8.8                     |

|                 |      |     |     |      |      |      |      |
|-----------------|------|-----|-----|------|------|------|------|
| Dimer <b>40</b> | 1058 | 337 | 314 | 0.0  | 0.0  | 2.5  | 8.8  |
| Dimer <b>41</b> | 888  | 385 | 334 | 0.0  | 0.2  | 0.0  | 8.9  |
| Dimer <b>42</b> | 1167 | 235 | 231 | 2.3  | -1.1 | 1.9  | 8.9  |
| Dimer <b>43</b> | 1063 | 194 | 177 | 2.4  | -3.7 | 0.5  | 9.0  |
| Dimer <b>44</b> | 1587 | 203 | 198 | 0.0  | 0.0  | 0.0  | 9.0  |
| Dimer <b>45</b> | 920  | 324 | 285 | 0.5  | -4.3 | -1.7 | 9.0  |
| Dimer <b>46</b> | 945  | 287 | 251 | 3.9  | -3.5 | -0.9 | 9.0  |
| Dimer <b>47</b> | 1367 | 254 | 236 | 0.4  | -2.3 | -0.8 | 9.1  |
| Dimer <b>48</b> | 1081 | 243 | 218 | 4.4  | -3.7 | 0.8  | 9.1  |
| Dimer <b>49</b> | 1194 | 282 | 274 | 2.7  | -2.2 | 0.1  | 9.1  |
| Dimer <b>50</b> | 883  | 414 | 324 | 2.6  | -4.0 | -1.0 | 9.2  |
| Dimer <b>51</b> | 1219 | 294 | 276 | 1.6  | -2.1 | -1.9 | 9.2  |
| Dimer <b>52</b> | 1132 | 284 | 276 | 0.3  | -2.0 | 2.3  | 9.4  |
| Dimer <b>53</b> | 1093 | 253 | 237 | 0.0  | -2.0 | 0.0  | 9.5  |
| Dimer <b>54</b> | 1014 | 218 | 205 | 1.6  | -2.8 | 2.2  | 9.6  |
| Dimer <b>55</b> | 998  | 295 | 272 | 1.1  | -1.9 | 0.1  | 9.6  |
| Dimer <b>56</b> | 1124 | 203 | 195 | 1.3  | -3.2 | 1.9  | 9.6  |
| Dimer <b>57</b> | 1153 | 180 | 168 | 2.7  | -3.1 | 0.8  | 9.7  |
| Dimer <b>58</b> | 1055 | 255 | 235 | 3.7  | -4.0 | -1.1 | 9.9  |
| Dimer <b>59</b> | 1255 | 252 | 236 | 0.8  | 0.4  | 0.2  | 9.9  |
| Dimer <b>60</b> | 1067 | 214 | 204 | 2.2  | -3.1 | 1.4  | 9.9  |
| Dimer <b>61</b> | 1002 | 323 | 310 | -1.2 | -2.5 | -0.4 | 10.0 |
| Dimer <b>62</b> | 964  | 301 | 268 | 4.2  | -3.5 | -1.4 | 10.0 |

<sup>a</sup> The names are given based on the stability ordering according to their relative energy (zero-point energy corrected), with **1** being the most stable one. The observed ones are in red. For the descriptive names of some selected low energy binary TFP conformers, see Table 2.

**Table S2.** Rotational transition frequencies of Dimer 1.

| $J'$ | $K_a'$ | $K_c'$ | $J''$ | $K_a''$ | $K_c''$ | Obs/ MHz  | Cal/ MHz  | Obs - Cal/ MHz |
|------|--------|--------|-------|---------|---------|-----------|-----------|----------------|
| 13   | 2      | 11     | 13    | 1       | 12      | 2099.3870 | 2099.3832 | 0.0038         |
| 12   | 2      | 10     | 12    | 1       | 11      | 2102.0940 | 2102.0963 | -0.0023        |
| 11   | 2      | 9      | 11    | 1       | 10      | 2119.0050 | 2119.0116 | -0.0066        |
| 4    | 1      | 4      | 3     | 1       | 3       | 2124.2210 | 2124.2214 | -0.0004        |
| 10   | 2      | 8      | 10    | 1       | 9       | 2147.7210 | 2147.7157 | 0.0053         |
| 8    | 2      | 7      | 8     | 1       | 7       | 2153.8550 | 2153.8619 | -0.0069        |
| 4    | 0      | 4      | 3     | 0       | 3       | 2161.8530 | 2161.8526 | 0.0004         |
| 4    | 2      | 3      | 3     | 2       | 2       | 2165.2480 | 2165.2481 | -0.0001        |
| 4    | 2      | 2      | 3     | 2       | 1       | 2168.9370 | 2168.9312 | 0.0058         |
| 9    | 2      | 7      | 9     | 1       | 8       | 2185.5750 | 2185.5725 | 0.0025         |
| 4    | 1      | 3      | 3     | 1       | 2       | 2205.3710 | 2205.3735 | -0.0025        |

|    |   |    |    |   |    |           |           |         |
|----|---|----|----|---|----|-----------|-----------|---------|
| 8  | 2 | 6  | 8  | 1 | 7  | 2229.7930 | 2229.7941 | -0.0011 |
| 7  | 2 | 6  | 7  | 1 | 6  | 2231.6180 | 2231.6199 | -0.0019 |
| 6  | 0 | 6  | 5  | 1 | 4  | 2236.2100 | 2236.2101 | -0.0001 |
| 7  | 2 | 5  | 7  | 1 | 6  | 2277.5480 | 2277.5444 | 0.0036  |
| 6  | 2 | 5  | 6  | 1 | 5  | 2300.4000 | 2300.4031 | -0.0031 |
| 6  | 2 | 4  | 6  | 1 | 5  | 2326.0560 | 2326.0565 | -0.0005 |
| 5  | 2 | 4  | 5  | 1 | 4  | 2359.8750 | 2359.8734 | 0.0016  |
| 5  | 2 | 3  | 5  | 1 | 4  | 2372.7470 | 2372.7450 | 0.0020  |
| 3  | 1 | 3  | 2  | 0 | 2  | 2400.2630 | 2400.2631 | -0.0001 |
| 4  | 2 | 3  | 4  | 1 | 3  | 2409.7710 | 2409.7700 | 0.0010  |
| 4  | 2 | 2  | 4  | 1 | 3  | 2415.2980 | 2415.2976 | 0.0004  |
| 3  | 2 | 2  | 3  | 1 | 2  | 2449.9020 | 2449.8954 | 0.0066  |
| 3  | 2 | 1  | 3  | 1 | 2  | 2451.7440 | 2451.7399 | 0.0041  |
| 2  | 2 | 1  | 2  | 1 | 1  | 2480.1070 | 2480.1050 | 0.0020  |
| 2  | 2 | 0  | 2  | 1 | 1  | 2480.4750 | 2480.4741 | 0.0009  |
| 3  | 1 | 2  | 2  | 0 | 2  | 2522.0250 | 2522.0272 | -0.0022 |
| 15 | 1 | 14 | 15 | 0 | 15 | 2538.4520 | 2538.4578 | -0.0058 |
| 6  | 0 | 6  | 5  | 1 | 5  | 2540.5100 | 2540.5082 | 0.0018  |
| 2  | 2 | 1  | 2  | 1 | 2  | 2541.0010 | 2540.9895 | 0.0115  |
| 3  | 2 | 2  | 3  | 1 | 3  | 2571.6570 | 2571.6596 | -0.0026 |
| 3  | 2 | 1  | 3  | 1 | 3  | 2573.5000 | 2573.5041 | -0.0041 |
| 4  | 2 | 3  | 4  | 1 | 4  | 2612.6830 | 2612.6863 | -0.0033 |
| 4  | 2 | 2  | 4  | 1 | 4  | 2618.2160 | 2618.2139 | 0.0021  |
| 5  | 1 | 5  | 4  | 1 | 4  | 2654.6050 | 2654.6054 | -0.0004 |
| 5  | 2 | 4  | 5  | 1 | 5  | 2664.1720 | 2664.1716 | 0.0004  |
| 5  | 2 | 3  | 5  | 1 | 5  | 2677.0400 | 2677.0432 | -0.0032 |
| 5  | 2 | 4  | 4  | 2 | 3  | 2706.0910 | 2706.0907 | 0.0003  |
| 5  | 4 | 1  | 4  | 4 | 0  | 2707.7270 | 2707.7274 | -0.0004 |
| 5  | 4 | 2  | 4  | 4 | 1  | 2707.7270 | 2707.7271 | -0.0001 |
| 5  | 2 | 3  | 4  | 2 | 2  | 2713.4360 | 2713.4346 | 0.0014  |
| 6  | 2 | 5  | 6  | 1 | 6  | 2726.2290 | 2726.2280 | 0.0010  |
| 6  | 2 | 4  | 6  | 1 | 6  | 2751.8870 | 2751.8814 | 0.0056  |
| 5  | 1 | 4  | 4  | 1 | 3  | 2755.9910 | 2755.9872 | 0.0038  |
| 7  | 2 | 6  | 7  | 1 | 7  | 2798.9670 | 2798.9690 | -0.0020 |
| 7  | 2 | 5  | 7  | 1 | 7  | 2844.8930 | 2844.8934 | -0.0004 |
| 8  | 2 | 7  | 8  | 1 | 8  | 2882.5000 | 2882.4986 | 0.0014  |
| 4  | 1 | 4  | 3  | 0 | 3  | 2901.8040 | 2901.8041 | -0.0001 |
| 8  | 2 | 6  | 8  | 1 | 8  | 2958.4320 | 2958.4308 | 0.0012  |
| 9  | 2 | 8  | 9  | 1 | 9  | 2976.9010 | 2976.9004 | 0.0006  |
| 10 | 2 | 9  | 10 | 1 | 10 | 3082.2240 | 3082.2254 | -0.0014 |

|    |   |    |    |   |    |           |           |         |
|----|---|----|----|---|----|-----------|-----------|---------|
| 9  | 2 | 7  | 9  | 1 | 9  | 3094.9110 | 3094.9125 | -0.0015 |
| 4  | 1 | 3  | 3  | 0 | 3  | 3104.7200 | 3104.7204 | -0.0004 |
| 7  | 0 | 7  | 6  | 1 | 6  | 3125.3150 | 3125.3127 | 0.0023  |
| 8  | 0 | 8  | 7  | 1 | 6  | 3144.9040 | 3144.9078 | -0.0038 |
| 6  | 1 | 6  | 5  | 1 | 5  | 3184.5650 | 3184.5643 | 0.0007  |
| 11 | 2 | 10 | 11 | 1 | 11 | 3198.4830 | 3198.4816 | 0.0014  |
| 6  | 0 | 6  | 5  | 0 | 5  | 3235.4990 | 3235.4981 | 0.0009  |
| 6  | 2 | 5  | 5  | 2 | 4  | 3246.6220 | 3246.6207 | 0.0013  |
| 6  | 5 | 1  | 5  | 5 | 0  | 3249.1990 | 3249.1958 | 0.0032  |
| 6  | 5 | 2  | 5  | 5 | 1  | 3249.1990 | 3249.1958 | 0.0032  |
| 6  | 4 | 2  | 5  | 4 | 1  | 3249.5300 | 3249.5321 | -0.0021 |
| 6  | 4 | 3  | 5  | 4 | 2  | 3249.5300 | 3249.5307 | -0.0007 |
| 6  | 3 | 4  | 5  | 3 | 3  | 3250.1930 | 3250.1929 | 0.0001  |
| 6  | 3 | 3  | 5  | 3 | 2  | 3250.4260 | 3250.4274 | -0.0014 |
| 10 | 2 | 8  | 10 | 1 | 10 | 3256.6830 | 3256.6839 | -0.0009 |
| 6  | 2 | 4  | 5  | 2 | 3  | 3259.4030 | 3259.4025 | 0.0005  |
| 6  | 1 | 5  | 5  | 1 | 4  | 3306.0920 | 3306.0910 | 0.0010  |
| 10 | 1 | 9  | 9  | 2 | 7  | 3313.1170 | 3313.1173 | -0.0003 |
| 12 | 2 | 11 | 12 | 1 | 12 | 3325.6240 | 3325.6237 | 0.0003  |
| 5  | 1 | 5  | 4  | 0 | 4  | 3394.5570 | 3394.5570 | 0.0000  |
| 10 | 1 | 9  | 9  | 2 | 8  | 3431.1280 | 3431.1294 | -0.0014 |
| 11 | 2 | 9  | 11 | 1 | 11 | 3445.8680 | 3445.8692 | -0.0012 |
| 13 | 2 | 12 | 13 | 1 | 13 | 3463.5320 | 3463.5445 | -0.0125 |
| 9  | 0 | 9  | 8  | 1 | 7  | 3570.8910 | 3570.8894 | 0.0016  |
| 2  | 2 | 1  | 1  | 1 | 0  | 3583.1720 | 3583.1721 | -0.0001 |
| 2  | 2 | 1  | 1  | 1 | 1  | 3603.4650 | 3603.4670 | -0.0020 |
| 2  | 2 | 0  | 1  | 1 | 1  | 3603.8360 | 3603.8361 | -0.0001 |
| 14 | 2 | 13 | 14 | 1 | 14 | 3612.0740 | 3612.0691 | 0.0049  |
| 5  | 1 | 4  | 4  | 0 | 4  | 3698.8540 | 3698.8551 | -0.0011 |
| 8  | 0 | 8  | 7  | 1 | 7  | 3712.2560 | 3712.2568 | -0.0008 |
| 7  | 1 | 7  | 6  | 1 | 6  | 3714.0350 | 3714.0352 | -0.0002 |
| 15 | 3 | 12 | 15 | 2 | 13 | 3741.9610 | 3741.9629 | -0.0019 |
| 7  | 0 | 7  | 6  | 0 | 6  | 3769.3690 | 3769.3688 | 0.0002  |
| 15 | 2 | 14 | 15 | 1 | 15 | 3770.9570 | 3770.9510 | 0.0060  |
| 14 | 3 | 12 | 14 | 2 | 12 | 3772.4270 | 3772.4262 | 0.0008  |
| 7  | 2 | 6  | 6  | 2 | 5  | 3786.7760 | 3786.7762 | -0.0002 |
| 14 | 2 | 12 | 13 | 3 | 10 | 3787.3700 | 3787.3649 | 0.0051  |
| 7  | 5 | 2  | 6  | 5 | 1  | 3790.9420 | 3790.9451 | -0.0031 |
| 7  | 5 | 3  | 6  | 5 | 2  | 3790.9420 | 3790.9451 | -0.0031 |
| 7  | 4 | 3  | 6  | 4 | 2  | 3791.4770 | 3791.4791 | -0.0021 |

|    |   |    |    |   |    |           |           |         |
|----|---|----|----|---|----|-----------|-----------|---------|
| 7  | 4 | 4  | 6  | 4 | 3  | 3791.4770 | 3791.4743 | 0.0027  |
| 7  | 3 | 5  | 6  | 3 | 4  | 3792.4530 | 3792.4505 | 0.0025  |
| 7  | 3 | 4  | 6  | 3 | 3  | 3792.9790 | 3792.9775 | 0.0015  |
| 7  | 2 | 5  | 6  | 2 | 4  | 3807.0460 | 3807.0473 | -0.0013 |
| 14 | 2 | 12 | 13 | 3 | 11 | 3820.1360 | 3820.1333 | 0.0027  |
| 14 | 3 | 11 | 14 | 2 | 12 | 3822.6350 | 3822.6405 | -0.0055 |
| 7  | 1 | 6  | 6  | 1 | 5  | 3855.5600 | 3855.5594 | 0.0006  |
| 13 | 3 | 11 | 13 | 2 | 11 | 3863.9500 | 3863.9563 | -0.0063 |
| 6  | 1 | 6  | 5  | 0 | 5  | 3879.5540 | 3879.5542 | -0.0002 |
| 11 | 1 | 10 | 10 | 2 | 8  | 3896.3580 | 3896.3593 | -0.0013 |
| 13 | 3 | 10 | 13 | 2 | 11 | 3896.7250 | 3896.7247 | 0.0003  |
| 12 | 3 | 10 | 12 | 2 | 10 | 3941.9060 | 3941.9069 | -0.0009 |
| 12 | 3 | 9  | 12 | 2 | 10 | 3962.5230 | 3962.5250 | -0.0020 |
| 10 | 0 | 10 | 9  | 1 | 8  | 3976.0360 | 3976.0380 | -0.0020 |
| 11 | 3 | 9  | 11 | 2 | 9  | 4006.5460 | 4006.5497 | -0.0037 |
| 11 | 3 | 8  | 11 | 2 | 9  | 4018.9870 | 4018.9853 | 0.0017  |
| 10 | 3 | 8  | 10 | 2 | 8  | 4058.5680 | 4058.5627 | 0.0053  |
| 10 | 3 | 7  | 10 | 2 | 8  | 4065.6990 | 4065.6971 | 0.0019  |
| 11 | 1 | 10 | 10 | 2 | 9  | 4070.8250 | 4070.8178 | 0.0072  |
| 9  | 3 | 7  | 9  | 2 | 7  | 4099.0088 | 4099.0035 | 0.0053  |
| 9  | 3 | 6  | 9  | 2 | 7  | 4102.8570 | 4102.8566 | 0.0004  |
| 3  | 2 | 2  | 2  | 1 | 1  | 4104.2590 | 4104.2602 | -0.0012 |
| 3  | 2 | 1  | 2  | 1 | 1  | 4106.1050 | 4106.1047 | 0.0003  |
| 8  | 3 | 6  | 8  | 2 | 6  | 4129.2380 | 4129.2372 | 0.0008  |
| 8  | 3 | 5  | 8  | 2 | 6  | 4131.1690 | 4131.1680 | 0.0010  |
| 7  | 3 | 5  | 7  | 2 | 5  | 4150.8280 | 4150.8299 | -0.0019 |
| 7  | 3 | 4  | 7  | 2 | 5  | 4151.7110 | 4151.7089 | 0.0021  |
| 3  | 2 | 2  | 2  | 1 | 2  | 4165.1450 | 4165.1447 | 0.0003  |
| 6  | 3 | 4  | 6  | 2 | 4  | 4165.4300 | 4165.4267 | 0.0033  |
| 6  | 3 | 3  | 6  | 2 | 4  | 4165.7790 | 4165.7787 | 0.0003  |
| 3  | 2 | 1  | 2  | 1 | 2  | 4166.9890 | 4166.9892 | -0.0002 |
| 5  | 3 | 3  | 5  | 2 | 3  | 4174.6421 | 4174.6364 | 0.0057  |
| 5  | 3 | 2  | 5  | 2 | 3  | 4174.7510 | 4174.7538 | -0.0028 |
| 3  | 3 | 1  | 3  | 2 | 1  | 4182.6090 | 4182.6085 | 0.0005  |
| 3  | 3 | 0  | 3  | 2 | 1  | 4182.6090 | 4182.6127 | -0.0037 |
| 3  | 3 | 0  | 3  | 2 | 2  | 4184.4540 | 4184.4572 | -0.0032 |
| 3  | 3 | 1  | 3  | 2 | 2  | 4184.4540 | 4184.4530 | 0.0010  |
| 4  | 3 | 1  | 4  | 2 | 3  | 4185.4740 | 4185.4938 | -0.0198 |
| 4  | 3 | 2  | 4  | 2 | 3  | 4185.4750 | 4185.4645 | 0.0105  |
| 5  | 3 | 3  | 5  | 2 | 4  | 4187.5160 | 4187.5080 | 0.0080  |

|    |   |    |    |   |    |           |           |         |
|----|---|----|----|---|----|-----------|-----------|---------|
| 6  | 3 | 4  | 6  | 2 | 5  | 4191.0800 | 4191.0801 | -0.0001 |
| 6  | 3 | 3  | 6  | 2 | 5  | 4191.4330 | 4191.4321 | 0.0009  |
| 7  | 3 | 5  | 7  | 2 | 6  | 4196.7520 | 4196.7544 | -0.0024 |
| 7  | 3 | 4  | 7  | 2 | 6  | 4197.6350 | 4197.6334 | 0.0016  |
| 8  | 3 | 6  | 8  | 2 | 7  | 4205.1690 | 4205.1694 | -0.0004 |
| 8  | 3 | 5  | 8  | 2 | 7  | 4207.0990 | 4207.1001 | -0.0011 |
| 9  | 3 | 7  | 9  | 2 | 8  | 4217.0160 | 4217.0156 | 0.0004  |
| 9  | 3 | 6  | 9  | 2 | 8  | 4220.8690 | 4220.8687 | 0.0003  |
| 10 | 3 | 8  | 10 | 2 | 9  | 4233.0210 | 4233.0212 | -0.0002 |
| 10 | 3 | 7  | 10 | 2 | 9  | 4240.1590 | 4240.1557 | 0.0033  |
| 8  | 1 | 8  | 7  | 1 | 7  | 4242.9650 | 4242.9660 | -0.0010 |
| 11 | 3 | 9  | 11 | 2 | 10 | 4253.9460 | 4253.9373 | 0.0087  |
| 11 | 3 | 8  | 11 | 2 | 10 | 4266.3730 | 4266.3729 | 0.0001  |
| 12 | 3 | 10 | 12 | 2 | 11 | 4280.5220 | 4280.5223 | -0.0003 |
| 9  | 0 | 9  | 8  | 1 | 8  | 4299.5250 | 4299.5261 | -0.0011 |
| 8  | 0 | 8  | 7  | 0 | 7  | 4300.9800 | 4300.9793 | 0.0007  |
| 12 | 3 | 9  | 12 | 2 | 11 | 4301.1430 | 4301.1404 | 0.0026  |
| 6  | 1 | 5  | 5  | 0 | 5  | 4305.3810 | 4305.3790 | 0.0020  |
| 13 | 3 | 11 | 13 | 2 | 12 | 4313.5250 | 4313.5272 | -0.0022 |
| 8  | 2 | 7  | 7  | 2 | 6  | 4326.5000 | 4326.4957 | 0.0043  |
| 8  | 7 | 1  | 7  | 7 | 0  | 4332.1260 | 4332.1264 | -0.0004 |
| 8  | 7 | 2  | 7  | 7 | 1  | 4332.1260 | 4332.1264 | -0.0004 |
| 8  | 6 | 2  | 7  | 6 | 1  | 4332.3730 | 4332.3765 | -0.0035 |
| 8  | 6 | 3  | 7  | 6 | 2  | 4332.3740 | 4332.3765 | -0.0025 |
| 8  | 5 | 3  | 7  | 5 | 2  | 4332.7950 | 4332.7944 | 0.0006  |
| 8  | 5 | 4  | 7  | 5 | 3  | 4332.7950 | 4332.7944 | 0.0006  |
| 8  | 4 | 5  | 7  | 4 | 4  | 4333.5880 | 4333.5804 | 0.0076  |
| 8  | 4 | 4  | 7  | 4 | 3  | 4333.5880 | 4333.5934 | -0.0054 |
| 8  | 3 | 6  | 7  | 3 | 5  | 4334.9110 | 4334.9107 | 0.0003  |
| 8  | 3 | 5  | 7  | 3 | 4  | 4335.9620 | 4335.9625 | -0.0005 |
| 13 | 3 | 10 | 13 | 2 | 12 | 4346.3000 | 4346.2956 | 0.0044  |
| 14 | 3 | 12 | 14 | 2 | 13 | 4353.6810 | 4353.6807 | 0.0003  |
| 8  | 2 | 6  | 7  | 2 | 5  | 4356.5020 | 4356.5034 | -0.0014 |
| 7  | 1 | 7  | 6  | 0 | 6  | 4358.0890 | 4358.0913 | -0.0023 |
| 11 | 0 | 11 | 10 | 1 | 9  | 4359.2940 | 4359.2925 | 0.0015  |
| 15 | 3 | 13 | 15 | 2 | 14 | 4401.6670 | 4401.6757 | -0.0087 |
| 14 | 3 | 11 | 14 | 2 | 13 | 4403.8950 | 4403.8951 | -0.0001 |
| 8  | 1 | 7  | 7  | 1 | 6  | 4404.2550 | 4404.2537 | 0.0013  |
| 15 | 2 | 13 | 14 | 3 | 11 | 4417.8580 | 4417.8512 | 0.0068  |
| 16 | 3 | 14 | 16 | 2 | 15 | 4458.1610 | 4458.1564 | 0.0046  |



---

|    |   |    |    |   |    |           |           |         |
|----|---|----|----|---|----|-----------|-----------|---------|
| 12 | 1 | 11 | 11 | 2 | 9  | 4468.9570 | 4468.9617 | -0.0047 |
| 15 | 3 | 12 | 15 | 2 | 14 | 4476.1990 | 4476.2043 | -0.0053 |
| 17 | 3 | 15 | 17 | 2 | 16 | 4523.7090 | 4523.7073 | 0.0017  |
| 16 | 3 | 13 | 16 | 2 | 15 | 4565.6680 | 4565.6715 | -0.0035 |
| 18 | 3 | 16 | 18 | 2 | 17 | 4598.8480 | 4598.8432 | 0.0048  |
| 4  | 2 | 3  | 3  | 1 | 2  | 4615.1440 | 4615.1435 | 0.0005  |
| 4  | 2 | 2  | 3  | 1 | 2  | 4620.6730 | 4620.6712 | 0.0018  |
| 12 | 1 | 11 | 11 | 2 | 10 | 4716.3500 | 4716.3493 | 0.0007  |
| 12 | 0 | 12 | 11 | 1 | 10 | 4720.0620 | 4720.0584 | 0.0036  |
| 4  | 2 | 3  | 3  | 1 | 3  | 4736.9100 | 4736.9076 | 0.0024  |
| 4  | 2 | 2  | 3  | 1 | 3  | 4742.4370 | 4742.4353 | 0.0017  |
| 9  | 1 | 9  | 8  | 1 | 8  | 4771.3190 | 4771.3171 | 0.0019  |
| 9  | 0 | 9  | 8  | 0 | 8  | 4830.2370 | 4830.2353 | 0.0017  |
| 8  | 1 | 8  | 7  | 0 | 7  | 4831.6880 | 4831.6886 | -0.0006 |
| 9  | 2 | 8  | 8  | 2 | 7  | 4865.7190 | 4865.7189 | 0.0001  |
| 9  | 7 | 2  | 8  | 7 | 1  | 4873.8140 | 4873.8104 | 0.0036  |
| 9  | 7 | 3  | 8  | 7 | 2  | 4873.8140 | 4873.8104 | 0.0036  |
| 9  | 6 | 3  | 8  | 6 | 2  | 4874.1650 | 4874.1645 | 0.0005  |
| 9  | 6 | 4  | 8  | 6 | 3  | 4874.1660 | 4874.1645 | 0.0015  |
| 9  | 5 | 4  | 8  | 5 | 3  | 4874.7600 | 4874.7582 | 0.0018  |
| 9  | 5 | 5  | 8  | 5 | 4  | 4874.7600 | 4874.7579 | 0.0021  |
| 9  | 3 | 7  | 8  | 3 | 6  | 4877.5680 | 4877.5650 | 0.0030  |
| 9  | 3 | 6  | 8  | 3 | 5  | 4879.4880 | 4879.4874 | 0.0006  |
| 10 | 0 | 10 | 9  | 1 | 9  | 4885.3770 | 4885.3780 | -0.0010 |
| 9  | 2 | 7  | 8  | 2 | 6  | 4907.8000 | 4907.7988 | 0.0012  |
| 7  | 1 | 6  | 6  | 0 | 6  | 4925.4430 | 4925.4403 | 0.0027  |
| 9  | 1 | 8  | 8  | 1 | 7  | 4952.0200 | 4952.0204 | -0.0004 |
| 13 | 1 | 12 | 12 | 2 | 10 | 5028.0740 | 5028.0729 | 0.0011  |
| 13 | 0 | 13 | 12 | 1 | 11 | 5058.3090 | 5058.3030 | 0.0060  |
| 5  | 2 | 4  | 4  | 1 | 3  | 5115.8590 | 5115.8607 | -0.0017 |
| 5  | 2 | 3  | 4  | 1 | 3  | 5128.7290 | 5128.7323 | -0.0033 |
| 10 | 1 | 10 | 9  | 1 | 9  | 5299.0600 | 5299.0616 | -0.0016 |
| 9  | 1 | 9  | 8  | 0 | 8  | 5302.0240 | 5302.0263 | -0.0023 |
| 5  | 2 | 4  | 4  | 1 | 4  | 5318.7740 | 5318.7770 | -0.0030 |
| 5  | 2 | 3  | 4  | 1 | 4  | 5331.6490 | 5331.6486 | 0.0004  |
| 10 | 0 | 10 | 9  | 0 | 9  | 5357.1670 | 5357.1690 | -0.0020 |
| 13 | 1 | 12 | 12 | 2 | 11 | 5366.6850 | 5366.6882 | -0.0032 |
| 14 | 0 | 14 | 13 | 1 | 12 | 5374.6000 | 5374.5982 | 0.0018  |
| 10 | 2 | 9  | 9  | 2 | 8  | 5404.3850 | 5404.3866 | -0.0016 |
| 10 | 7 | 3  | 9  | 7 | 2  | 5415.5580 | 5415.5536 | 0.0044  |

---

|    |   |    |    |   |    |           |           |         |
|----|---|----|----|---|----|-----------|-----------|---------|
| 10 | 7 | 4  | 9  | 7 | 3  | 5415.5580 | 5415.5536 | 0.0044  |
| 10 | 4 | 7  | 9  | 4 | 6  | 5418.3620 | 5418.3638 | -0.0018 |
| 10 | 4 | 6  | 9  | 4 | 5  | 5418.4360 | 5418.4314 | 0.0046  |
| 10 | 3 | 8  | 9  | 3 | 7  | 5420.3930 | 5420.3923 | 0.0007  |
| 10 | 3 | 7  | 9  | 3 | 6  | 5423.6730 | 5423.6736 | -0.0006 |
| 10 | 2 | 8  | 9  | 2 | 7  | 5460.8350 | 5460.8330 | 0.0020  |
| 11 | 0 | 11 | 10 | 1 | 10 | 5468.2610 | 5468.2607 | 0.0003  |
| 10 | 1 | 9  | 9  | 1 | 8  | 5498.6890 | 5498.6898 | -0.0008 |
| 8  | 1 | 7  | 7  | 0 | 7  | 5560.3290 | 5560.3253 | 0.0037  |
| 14 | 1 | 13 | 13 | 2 | 11 | 5571.0500 | 5571.0574 | -0.0074 |
| 6  | 2 | 5  | 5  | 1 | 4  | 5606.4950 | 5606.4942 | 0.0008  |
| 6  | 2 | 4  | 5  | 1 | 4  | 5632.1460 | 5632.1476 | -0.0016 |
| 16 | 4 | 12 | 16 | 3 | 13 | 5737.7320 | 5737.7245 | 0.0075  |
| 15 | 4 | 11 | 15 | 3 | 12 | 5768.6370 | 5768.6283 | 0.0087  |
| 10 | 1 | 10 | 9  | 0 | 9  | 5770.8550 | 5770.8526 | 0.0024  |
| 14 | 4 | 10 | 14 | 3 | 11 | 5792.7930 | 5792.7987 | -0.0057 |
| 3  | 3 | 1  | 2  | 2 | 0  | 5808.2410 | 5808.2391 | 0.0019  |
| 3  | 3 | 0  | 2  | 2 | 0  | 5808.2430 | 5808.2433 | -0.0003 |
| 3  | 3 | 1  | 2  | 2 | 1  | 5808.6110 | 5808.6081 | 0.0029  |
| 3  | 3 | 0  | 2  | 2 | 1  | 5808.6110 | 5808.6123 | -0.0013 |
| 13 | 4 | 10 | 13 | 3 | 10 | 5810.3960 | 5810.4013 | -0.0053 |
| 13 | 4 | 9  | 13 | 3 | 10 | 5811.3530 | 5811.3544 | -0.0014 |
| 12 | 4 | 8  | 12 | 3 | 9  | 5825.3350 | 5825.3294 | 0.0056  |
| 11 | 1 | 11 | 10 | 1 | 10 | 5826.1820 | 5826.1857 | -0.0037 |
| 11 | 4 | 8  | 11 | 3 | 8  | 5835.3780 | 5835.3896 | -0.0116 |
| 11 | 4 | 7  | 11 | 3 | 8  | 5835.6420 | 5835.6429 | -0.0009 |
| 15 | 4 | 12 | 15 | 3 | 13 | 5840.2000 | 5840.2122 | -0.0122 |
| 16 | 4 | 13 | 16 | 3 | 14 | 5840.3520 | 5840.3525 | -0.0005 |
| 14 | 4 | 11 | 14 | 3 | 12 | 5841.3010 | 5841.3023 | -0.0013 |
| 13 | 4 | 9  | 13 | 3 | 11 | 5844.1320 | 5844.1229 | 0.0091  |
| 12 | 4 | 9  | 12 | 3 | 10 | 5845.4420 | 5845.4417 | 0.0003  |
| 12 | 4 | 8  | 12 | 3 | 10 | 5845.9460 | 5845.9474 | -0.0014 |
| 11 | 4 | 8  | 11 | 3 | 9  | 5847.8230 | 5847.8252 | -0.0022 |
| 11 | 4 | 7  | 11 | 3 | 9  | 5848.0820 | 5848.0785 | 0.0035  |
| 8  | 4 | 5  | 8  | 3 | 5  | 5851.9080 | 5851.8965 | 0.0115  |
| 8  | 4 | 4  | 8  | 3 | 5  | 5851.9100 | 5851.9161 | -0.0061 |
| 8  | 4 | 5  | 8  | 3 | 6  | 5853.8370 | 5853.8273 | 0.0097  |
| 8  | 4 | 4  | 8  | 3 | 6  | 5853.8370 | 5853.8468 | -0.0098 |
| 7  | 4 | 3  | 7  | 3 | 4  | 5854.2830 | 5854.2851 | -0.0021 |
| 7  | 4 | 4  | 7  | 3 | 4  | 5854.2850 | 5854.2786 | 0.0064  |

|    |   |    |    |   |    |           |           |         |
|----|---|----|----|---|----|-----------|-----------|---------|
| 7  | 4 | 3  | 7  | 3 | 5  | 5855.1620 | 5855.1640 | -0.0020 |
| 7  | 4 | 4  | 7  | 3 | 5  | 5855.1620 | 5855.1575 | 0.0045  |
| 6  | 4 | 3  | 6  | 3 | 3  | 5855.7800 | 5855.7817 | -0.0017 |
| 6  | 4 | 2  | 6  | 3 | 3  | 5855.7810 | 5855.7835 | -0.0025 |
| 6  | 4 | 2  | 6  | 3 | 4  | 5856.1340 | 5856.1354 | -0.0014 |
| 6  | 4 | 3  | 6  | 3 | 4  | 5856.1340 | 5856.1337 | 0.0003  |
| 11 | 0 | 11 | 10 | 0 | 10 | 5881.9420 | 5881.9443 | -0.0023 |
| 6  | 2 | 5  | 5  | 1 | 5  | 5910.7920 | 5910.7923 | -0.0003 |
| 6  | 2 | 4  | 5  | 1 | 5  | 5936.4430 | 5936.4457 | -0.0027 |
| 11 | 2 | 10 | 10 | 2 | 9  | 5942.4480 | 5942.4419 | 0.0061  |
| 11 | 8 | 3  | 10 | 8 | 2  | 5956.9440 | 5956.9466 | -0.0026 |
| 11 | 8 | 4  | 10 | 8 | 3  | 5956.9440 | 5956.9466 | -0.0026 |
| 11 | 7 | 4  | 10 | 7 | 3  | 5957.3650 | 5957.3628 | 0.0022  |
| 11 | 7 | 5  | 10 | 7 | 4  | 5957.3650 | 5957.3628 | 0.0022  |
| 11 | 6 | 5  | 10 | 6 | 4  | 5958.0080 | 5958.0053 | 0.0027  |
| 11 | 6 | 6  | 10 | 6 | 5  | 5958.0080 | 5958.0053 | 0.0027  |
| 11 | 5 | 6  | 10 | 5 | 5  | 5959.0840 | 5959.0869 | -0.0029 |
| 11 | 5 | 7  | 10 | 5 | 6  | 5959.0840 | 5959.0852 | -0.0012 |
| 11 | 4 | 8  | 10 | 4 | 7  | 5961.0760 | 5961.0792 | -0.0032 |
| 11 | 4 | 7  | 10 | 4 | 6  | 5961.2160 | 5961.2141 | 0.0019  |
| 11 | 3 | 9  | 10 | 3 | 8  | 5963.3590 | 5963.3580 | 0.0010  |
| 11 | 3 | 8  | 10 | 3 | 7  | 5968.6580 | 5968.6591 | -0.0011 |
| 11 | 2 | 9  | 10 | 2 | 8  | 6015.3690 | 6015.3709 | -0.0019 |
| 11 | 1 | 10 | 10 | 1 | 9  | 6044.0740 | 6044.0750 | -0.0010 |
| 12 | 0 | 12 | 11 | 1 | 11 | 6046.9190 | 6046.9160 | 0.0030  |
| 7  | 2 | 6  | 6  | 1 | 5  | 6087.1800 | 6087.1793 | 0.0007  |
| 7  | 2 | 5  | 6  | 1 | 5  | 6133.1040 | 6133.1038 | 0.0002  |
| 9  | 1 | 8  | 8  | 0 | 8  | 6211.3680 | 6211.3664 | 0.0016  |
| 11 | 1 | 11 | 10 | 0 | 10 | 6239.8670 | 6239.8693 | -0.0023 |
| 4  | 3 | 2  | 3  | 2 | 2  | 6350.7320 | 6350.7125 | 0.0195  |
| 4  | 3 | 1  | 3  | 2 | 2  | 6350.7330 | 6350.7419 | -0.0089 |
| 12 | 1 | 12 | 11 | 1 | 11 | 6352.6850 | 6352.6882 | -0.0032 |
| 12 | 0 | 12 | 11 | 0 | 11 | 6404.8380 | 6404.8410 | -0.0030 |
| 12 | 2 | 11 | 11 | 2 | 10 | 6479.8270 | 6479.8302 | -0.0032 |
| 12 | 6 | 6  | 11 | 6 | 5  | 6500.0770 | 6500.0770 | 0.0000  |
| 12 | 6 | 7  | 11 | 6 | 6  | 6500.0770 | 6500.0770 | 0.0000  |
| 12 | 5 | 7  | 11 | 5 | 6  | 6501.4790 | 6501.4812 | -0.0022 |
| 12 | 5 | 8  | 11 | 5 | 7  | 6501.4790 | 6501.4774 | 0.0016  |
| 12 | 4 | 9  | 11 | 4 | 8  | 6504.0340 | 6504.0317 | 0.0023  |
| 12 | 4 | 8  | 11 | 4 | 7  | 6504.2820 | 6504.2842 | -0.0022 |

|    |   |    |    |   |    |           |           |         |
|----|---|----|----|---|----|-----------|-----------|---------|
| 12 | 3 | 10 | 11 | 3 | 9  | 6506.4080 | 6506.4152 | -0.0072 |
| 7  | 2 | 6  | 6  | 1 | 6  | 6513.0020 | 6513.0041 | -0.0021 |
| 12 | 3 | 9  | 11 | 3 | 8  | 6514.5900 | 6514.5977 | -0.0077 |
| 8  | 2 | 7  | 7  | 1 | 6  | 6558.1130 | 6558.1156 | -0.0026 |
| 7  | 2 | 5  | 6  | 1 | 6  | 6558.9230 | 6558.9286 | -0.0056 |
| 12 | 2 | 10 | 11 | 2 | 9  | 6571.0600 | 6571.0580 | 0.0020  |
| 12 | 1 | 11 | 11 | 1 | 10 | 6587.9750 | 6587.9733 | 0.0017  |
| 13 | 0 | 13 | 12 | 1 | 12 | 6620.4460 | 6620.4457 | 0.0003  |
| 8  | 2 | 6  | 7  | 1 | 6  | 6634.0480 | 6634.0478 | 0.0002  |
| 12 | 1 | 12 | 11 | 0 | 11 | 6710.6150 | 6710.6131 | 0.0019  |

**Table S3.** Rotational transition frequencies of Dimer 3.

| $J'$ | $K_a'$ | $K_c'$ | $J''$ | $K_a''$ | $K_c''$ | Obs/ MHz  | Cal/ MHz  | Obs - Cal/ MHz |
|------|--------|--------|-------|---------|---------|-----------|-----------|----------------|
| 7    | 2      | 5      | 7     | 1       | 6       | 1920.7340 | 1920.7339 | 0.0001         |
| 6    | 2      | 4      | 6     | 1       | 5       | 1969.6230 | 1969.6288 | -0.0058        |
| 5    | 2      | 3      | 5     | 1       | 4       | 2020.5140 | 2020.5167 | -0.0027        |
| 4    | 2      | 2      | 4     | 1       | 3       | 2069.4380 | 2069.4358 | 0.0022         |
| 12   | 1      | 11     | 12    | 0       | 12      | 2104.7790 | 2104.7838 | -0.0048        |
| 3    | 2      | 1      | 3     | 1       | 2       | 2112.8980 | 2112.8993 | -0.0013        |
| 2    | 2      | 0      | 2     | 1       | 1       | 2148.0390 | 2148.0374 | 0.0016         |
| 2    | 2      | 1      | 2     | 1       | 2       | 2223.8580 | 2223.8586 | -0.0006        |
| 3    | 2      | 2      | 3     | 1       | 3       | 2262.5230 | 2262.5220 | 0.0010         |
| 7    | 1      | 6      | 6     | 2       | 5       | 2294.4210 | 2294.4210 | 0.0000         |
| 4    | 2      | 3      | 4     | 1       | 4       | 2314.3070 | 2314.3042 | 0.0028         |
| 5    | 0      | 5      | 4     | 1       | 4       | 2333.3340 | 2333.3402 | -0.0062        |
| 13   | 1      | 12     | 13    | 0       | 13      | 2369.4670 | 2369.4659 | 0.0011         |
| 5    | 2      | 4      | 5     | 1       | 5       | 2379.3740 | 2379.3714 | 0.0026         |
| 3    | 1      | 3      | 2     | 0       | 2       | 2425.9150 | 2425.9140 | 0.0010         |
| 6    | 2      | 5      | 6     | 1       | 6       | 2457.8980 | 2457.8926 | 0.0054         |
| 7    | 2      | 6      | 7     | 1       | 7       | 2550.0200 | 2550.0174 | 0.0026         |
| 14   | 1      | 13     | 14    | 0       | 14      | 2653.1210 | 2653.1178 | 0.0032         |
| 8    | 2      | 7      | 8     | 1       | 8       | 2655.8480 | 2655.8507 | -0.0027        |
| 9    | 2      | 8      | 9     | 1       | 9       | 2775.4350 | 2775.4280 | 0.0070         |
| 10   | 2      | 9      | 10    | 1       | 10      | 2908.6940 | 2908.6931 | 0.0009         |
| 16   | 3      | 13     | 16    | 2       | 14      | 2944.1520 | 2944.1514 | 0.0006         |
| 15   | 1      | 14     | 15    | 0       | 15      | 2951.9120 | 2951.8999 | 0.0121         |
| 4    | 1      | 4      | 3     | 0       | 3       | 2967.4760 | 2967.4782 | -0.0022        |
| 6    | 0      | 6      | 5     | 1       | 5       | 2968.0990 | 2968.1023 | -0.0033        |

|    |   |    |    |   |    |           |           |         |
|----|---|----|----|---|----|-----------|-----------|---------|
| 8  | 1 | 7  | 7  | 2 | 6  | 2977.8210 | 2977.8159 | 0.0051  |
| 15 | 3 | 12 | 15 | 2 | 13 | 3026.7230 | 3026.7254 | -0.0024 |
| 11 | 2 | 10 | 11 | 1 | 11 | 3055.4780 | 3055.4787 | -0.0007 |
| 14 | 3 | 11 | 14 | 2 | 12 | 3115.6960 | 3115.7011 | -0.0051 |
| 13 | 3 | 10 | 13 | 2 | 11 | 3206.1430 | 3206.1359 | 0.0071  |
| 12 | 2 | 11 | 12 | 1 | 12 | 3215.4910 | 3215.4933 | -0.0023 |
| 4  | 1 | 3  | 3  | 0 | 3  | 3222.3420 | 3222.3483 | -0.0063 |
| 16 | 1 | 15 | 16 | 0 | 16 | 3261.7180 | 3261.7141 | 0.0039  |
| 12 | 3 | 9  | 12 | 2 | 10 | 3293.4930 | 3293.4912 | 0.0018  |
| 2  | 2 | 1  | 1  | 1 | 0  | 3355.2750 | 3355.2740 | 0.0010  |
| 2  | 2 | 0  | 1  | 1 | 0  | 3355.9390 | 3355.9429 | -0.0039 |
| 11 | 3 | 8  | 11 | 2 | 9  | 3373.9180 | 3373.9229 | -0.0049 |
| 2  | 2 | 1  | 1  | 1 | 1  | 3380.7710 | 3380.7713 | -0.0003 |
| 2  | 2 | 0  | 1  | 1 | 1  | 3381.4400 | 3381.4402 | -0.0002 |
| 13 | 2 | 12 | 13 | 1 | 13 | 3388.3090 | 3388.3152 | -0.0062 |
| 10 | 3 | 7  | 10 | 2 | 8  | 3444.5380 | 3444.5308 | 0.0072  |
| 9  | 3 | 7  | 9  | 2 | 7  | 3493.5230 | 3493.5291 | -0.0061 |
| 5  | 1 | 5  | 4  | 0 | 4  | 3498.7684 | 3498.7667 | 0.0017  |
| 9  | 3 | 6  | 9  | 2 | 7  | 3503.5280 | 3503.5279 | 0.0001  |
| 8  | 0 | 8  | 7  | 1 | 6  | 3529.0170 | 3529.0120 | 0.0050  |
| 9  | 1 | 8  | 8  | 2 | 6  | 3535.0370 | 3535.0284 | 0.0086  |
| 8  | 3 | 5  | 8  | 2 | 6  | 3550.2930 | 3550.2928 | 0.0002  |
| 14 | 2 | 13 | 14 | 1 | 14 | 3573.3890 | 3573.3933 | -0.0043 |
| 7  | 3 | 4  | 7  | 2 | 5  | 3585.2790 | 3585.2791 | -0.0001 |
| 7  | 0 | 7  | 6  | 1 | 6  | 3604.7040 | 3604.7042 | -0.0002 |
| 6  | 3 | 4  | 6  | 2 | 4  | 3608.8780 | 3608.8716 | 0.0064  |
| 6  | 3 | 3  | 6  | 2 | 4  | 3609.7900 | 3609.7902 | -0.0002 |
| 5  | 3 | 2  | 5  | 2 | 3  | 3625.6700 | 3625.6706 | -0.0006 |
| 4  | 3 | 1  | 4  | 2 | 2  | 3634.9840 | 3634.9832 | 0.0008  |
| 3  | 3 | 0  | 3  | 2 | 1  | 3639.7360 | 3639.7348 | 0.0012  |
| 3  | 3 | 1  | 3  | 2 | 2  | 3643.0650 | 3643.0652 | -0.0002 |
| 4  | 3 | 2  | 4  | 2 | 3  | 3644.9100 | 3644.9081 | 0.0019  |
| 5  | 3 | 3  | 5  | 2 | 4  | 3648.6040 | 3648.6008 | 0.0032  |
| 5  | 3 | 2  | 5  | 2 | 4  | 3648.9050 | 3648.9075 | -0.0025 |
| 6  | 3 | 4  | 6  | 2 | 5  | 3655.0110 | 3655.0099 | 0.0011  |
| 6  | 3 | 3  | 6  | 2 | 5  | 3655.9370 | 3655.9285 | 0.0085  |
| 7  | 3 | 5  | 7  | 2 | 6  | 3665.1170 | 3665.1169 | 0.0001  |
| 7  | 3 | 4  | 7  | 2 | 6  | 3667.4110 | 3667.4080 | 0.0030  |
| 9  | 1 | 8  | 8  | 2 | 7  | 3669.7490 | 3669.7482 | 0.0008  |
| 8  | 3 | 6  | 8  | 2 | 7  | 3679.9890 | 3679.9891 | -0.0001 |

|    |   |    |    |   |    |           |           |         |
|----|---|----|----|---|----|-----------|-----------|---------|
| 9  | 3 | 7  | 9  | 2 | 8  | 3700.7470 | 3700.7480 | -0.0010 |
| 10 | 3 | 8  | 10 | 2 | 9  | 3728.5360 | 3728.5355 | 0.0005  |
| 11 | 3 | 9  | 11 | 2 | 10 | 3764.4820 | 3764.4814 | 0.0006  |
| 15 | 2 | 14 | 15 | 1 | 15 | 3770.0540 | 3770.0567 | -0.0027 |
| 13 | 2 | 12 | 12 | 3 | 9  | 3783.8650 | 3783.8643 | 0.0007  |
| 12 | 3 | 10 | 12 | 2 | 11 | 3809.6740 | 3809.6717 | 0.0023  |
| 13 | 3 | 11 | 13 | 2 | 12 | 3865.1170 | 3865.1185 | -0.0015 |
| 12 | 2 | 10 | 11 | 3 | 9  | 3868.0340 | 3868.0335 | 0.0005  |
| 5  | 1 | 4  | 4  | 0 | 4  | 3880.8620 | 3880.8583 | 0.0037  |
| 3  | 2 | 2  | 2  | 1 | 1  | 3920.9780 | 3920.9791 | -0.0011 |
| 3  | 2 | 1  | 2  | 1 | 1  | 3924.3170 | 3924.3205 | -0.0035 |
| 14 | 3 | 12 | 14 | 2 | 13 | 3931.7370 | 3931.7349 | 0.0021  |
| 9  | 0 | 9  | 8  | 1 | 7  | 3960.2810 | 3960.2764 | 0.0046  |
| 3  | 2 | 2  | 2  | 1 | 2  | 3997.4631 | 3997.4693 | -0.0062 |
| 3  | 2 | 1  | 2  | 1 | 2  | 4000.8110 | 4000.8107 | 0.0003  |
| 15 | 3 | 13 | 15 | 2 | 14 | 4010.3130 | 4010.3115 | 0.0015  |
| 6  | 1 | 6  | 5  | 0 | 5  | 4021.6360 | 4021.6392 | -0.0032 |
| 16 | 3 | 14 | 16 | 2 | 15 | 4101.4890 | 4101.4977 | -0.0087 |
| 17 | 2 | 16 | 17 | 1 | 17 | 4194.9520 | 4194.9565 | -0.0045 |
| 17 | 3 | 15 | 17 | 2 | 16 | 4205.7860 | 4205.7871 | -0.0011 |
| 8  | 0 | 8  | 7  | 1 | 7  | 4240.4240 | 4240.4244 | -0.0004 |
| 14 | 2 | 13 | 13 | 3 | 10 | 4279.3490 | 4279.3531 | -0.0041 |
| 18 | 3 | 16 | 18 | 2 | 17 | 4323.5020 | 4323.5063 | -0.0043 |
| 10 | 1 | 9  | 9  | 2 | 8  | 4368.9260 | 4368.9250 | 0.0010  |
| 4  | 2 | 3  | 3  | 1 | 2  | 4473.8300 | 4473.8312 | -0.0012 |
| 4  | 2 | 2  | 3  | 1 | 2  | 4483.8350 | 4483.8328 | 0.0022  |
| 7  | 1 | 7  | 6  | 0 | 6  | 4538.3690 | 4538.3725 | -0.0035 |
| 6  | 1 | 5  | 5  | 0 | 5  | 4556.0380 | 4556.0413 | -0.0033 |
| 13 | 2 | 11 | 12 | 3 | 10 | 4578.6900 | 4578.6942 | -0.0042 |
| 4  | 2 | 3  | 3  | 1 | 3  | 4626.7970 | 4626.7953 | 0.0017  |
| 4  | 2 | 2  | 3  | 1 | 3  | 4636.7960 | 4636.7969 | -0.0009 |
| 18 | 4 | 14 | 18 | 3 | 15 | 4688.4900 | 4688.4944 | -0.0044 |
| 17 | 4 | 13 | 17 | 3 | 14 | 4778.0070 | 4778.0058 | 0.0012  |
| 16 | 4 | 12 | 16 | 3 | 13 | 4853.8040 | 4853.7941 | 0.0099  |
| 9  | 0 | 9  | 8  | 1 | 8  | 4872.7880 | 4872.7873 | 0.0007  |
| 15 | 4 | 11 | 15 | 3 | 12 | 4916.0570 | 4916.0666 | -0.0096 |
| 14 | 4 | 10 | 14 | 3 | 11 | 4965.7870 | 4965.7815 | 0.0055  |
| 13 | 4 | 9  | 13 | 3 | 10 | 5004.3880 | 5004.3857 | 0.0023  |
| 5  | 2 | 4  | 4  | 1 | 3  | 5013.9040 | 5013.9071 | -0.0031 |
| 12 | 4 | 8  | 12 | 3 | 9  | 5033.5640 | 5033.5628 | 0.0012  |

|    |   |    |    |   |    |           |           |         |
|----|---|----|----|---|----|-----------|-----------|---------|
| 8  | 1 | 8  | 7  | 0 | 7  | 5051.5250 | 5051.5193 | 0.0057  |
| 11 | 4 | 7  | 11 | 3 | 8  | 5055.0300 | 5055.0299 | 0.0001  |
| 10 | 4 | 6  | 10 | 3 | 7  | 5070.3940 | 5070.3945 | -0.0005 |
| 11 | 1 | 10 | 10 | 2 | 9  | 5073.7690 | 5073.7670 | 0.0020  |
| 9  | 4 | 6  | 9  | 3 | 6  | 5080.8730 | 5080.8826 | -0.0096 |
| 9  | 4 | 5  | 9  | 3 | 6  | 5081.0750 | 5081.0734 | 0.0016  |
| 13 | 4 | 10 | 13 | 3 | 11 | 5083.9590 | 5083.9578 | 0.0012  |
| 12 | 4 | 9  | 12 | 3 | 10 | 5084.3990 | 5084.3997 | -0.0007 |
| 14 | 4 | 11 | 14 | 3 | 12 | 5085.5120 | 5085.5084 | 0.0036  |
| 11 | 4 | 8  | 11 | 3 | 9  | 5086.0830 | 5086.0828 | 0.0002  |
| 8  | 4 | 4  | 8  | 3 | 5  | 5088.2565 | 5088.2574 | -0.0009 |
| 10 | 4 | 7  | 10 | 3 | 8  | 5088.3913 | 5088.3981 | -0.0068 |
| 9  | 4 | 6  | 9  | 3 | 7  | 5090.8780 | 5090.8814 | -0.0034 |
| 7  | 4 | 3  | 7  | 3 | 4  | 5092.9090 | 5092.9103 | -0.0013 |
| 8  | 4 | 5  | 8  | 3 | 6  | 5093.2080 | 5093.2073 | 0.0007  |
| 7  | 4 | 4  | 7  | 3 | 5  | 5095.1780 | 5095.1769 | 0.0011  |
| 6  | 4 | 2  | 6  | 3 | 3  | 5095.7880 | 5095.7873 | 0.0007  |
| 6  | 4 | 3  | 6  | 3 | 3  | 5095.7880 | 5095.7806 | 0.0074  |
| 6  | 4 | 3  | 6  | 3 | 4  | 5096.6990 | 5096.6991 | -0.0001 |
| 5  | 4 | 1  | 5  | 3 | 2  | 5097.4620 | 5097.4623 | -0.0003 |
| 5  | 4 | 2  | 5  | 3 | 3  | 5097.7680 | 5097.7676 | 0.0004  |
| 17 | 4 | 14 | 17 | 3 | 15 | 5111.4830 | 5111.4782 | 0.0048  |
| 18 | 4 | 15 | 18 | 3 | 16 | 5130.8180 | 5130.8204 | -0.0024 |
| 7  | 1 | 6  | 6  | 0 | 6  | 5249.7880 | 5249.7849 | 0.0031  |
| 5  | 2 | 4  | 4  | 1 | 4  | 5268.7730 | 5268.7772 | -0.0042 |
| 5  | 2 | 3  | 4  | 1 | 4  | 5292.0130 | 5292.0141 | -0.0011 |
| 3  | 3 | 1  | 2  | 2 | 0  | 5416.0060 | 5416.0069 | -0.0009 |
| 3  | 3 | 0  | 2  | 2 | 1  | 5416.6820 | 5416.6868 | -0.0048 |
| 10 | 0 | 10 | 9  | 1 | 9  | 5499.8010 | 5499.8022 | -0.0012 |
| 6  | 2 | 5  | 5  | 1 | 4  | 5541.3730 | 5541.3746 | -0.0016 |
| 9  | 1 | 9  | 8  | 0 | 8  | 5563.6950 | 5563.6972 | -0.0022 |
| 6  | 2 | 4  | 5  | 1 | 4  | 5587.5120 | 5587.5129 | -0.0009 |
| 12 | 1 | 11 | 11 | 2 | 10 | 5782.3910 | 5782.3893 | 0.0017  |
| 6  | 2 | 5  | 5  | 1 | 5  | 5923.4600 | 5923.4662 | -0.0062 |
| 8  | 1 | 7  | 7  | 0 | 7  | 5964.0300 | 5964.0303 | -0.0003 |
| 6  | 2 | 4  | 5  | 1 | 5  | 5969.6000 | 5969.6045 | -0.0045 |
| 4  | 3 | 2  | 3  | 2 | 1  | 6005.8380 | 6005.8400 | -0.0020 |
| 4  | 3 | 1  | 3  | 2 | 2  | 6009.2560 | 6009.2581 | -0.0021 |
| 7  | 2 | 6  | 6  | 1 | 5  | 6056.5180 | 6056.5165 | 0.0015  |
| 10 | 1 | 10 | 9  | 0 | 9  | 6077.3330 | 6077.3339 | -0.0009 |

|    |   |    |    |   |    |           |           |         |
|----|---|----|----|---|----|-----------|-----------|---------|
| 11 | 0 | 11 | 10 | 1 | 10 | 6120.1200 | 6120.1221 | -0.0021 |
| 7  | 2 | 5  | 6  | 1 | 5  | 6138.6480 | 6138.6454 | 0.0026  |
| 13 | 1 | 12 | 12 | 2 | 11 | 6492.6010 | 6492.6075 | -0.0065 |
| 15 | 5 | 11 | 15 | 4 | 12 | 6521.1480 | 6521.1480 | 0.0000  |
| 14 | 5 | 10 | 14 | 4 | 11 | 6528.5060 | 6528.5172 | -0.0112 |
| 13 | 5 | 8  | 13 | 4 | 9  | 6531.3920 | 6531.3855 | 0.0065  |
| 12 | 5 | 7  | 12 | 4 | 8  | 6538.3070 | 6538.3037 | 0.0033  |
| 12 | 5 | 8  | 12 | 4 | 9  | 6540.1550 | 6540.1573 | -0.0023 |
| 11 | 5 | 6  | 11 | 4 | 7  | 6543.5300 | 6543.5331 | -0.0031 |
| 11 | 5 | 7  | 11 | 4 | 8  | 6544.4670 | 6544.4670 | 0.0000  |
| 10 | 5 | 5  | 10 | 4 | 6  | 6547.4370 | 6547.4280 | 0.0090  |
| 10 | 5 | 6  | 10 | 4 | 7  | 6547.8670 | 6547.8666 | 0.0004  |
| 9  | 5 | 4  | 9  | 4 | 5  | 6550.2700 | 6550.2725 | -0.0025 |
| 9  | 5 | 5  | 9  | 4 | 6  | 6550.4530 | 6550.4614 | -0.0084 |
| 7  | 5 | 2  | 7  | 4 | 3  | 6553.7000 | 6553.6860 | 0.0140  |
| 7  | 5 | 3  | 7  | 4 | 4  | 6553.7000 | 6553.7105 | -0.0105 |
| 6  | 5 | 1  | 6  | 4 | 2  | 6554.6030 | 6554.5962 | 0.0068  |
| 6  | 5 | 2  | 6  | 4 | 3  | 6554.6050 | 6554.6028 | 0.0022  |
| 5  | 5 | 0  | 5  | 4 | 1  | 6555.1500 | 6555.1536 | -0.0036 |
| 5  | 5 | 1  | 5  | 4 | 2  | 6555.1500 | 6555.1549 | -0.0049 |
| 8  | 2 | 7  | 7  | 1 | 6  | 6559.7590 | 6559.7606 | -0.0016 |
| 5  | 3 | 3  | 4  | 2 | 2  | 6593.0720 | 6593.0721 | -0.0001 |
| 5  | 3 | 2  | 4  | 2 | 2  | 6593.3750 | 6593.3788 | -0.0038 |
| 11 | 1 | 11 | 10 | 0 | 10 | 6594.4370 | 6594.4271 | 0.0099  |
| 5  | 3 | 3  | 4  | 2 | 3  | 6603.0780 | 6603.0737 | 0.0043  |
| 5  | 3 | 2  | 4  | 2 | 3  | 6603.3810 | 6603.3804 | 0.0006  |
| 7  | 2 | 5  | 6  | 1 | 6  | 6673.0540 | 6673.0476 | 0.0064  |
| 12 | 0 | 12 | 11 | 1 | 11 | 6733.0870 | 6733.0842 | 0.0028  |

**Table S4.** Rotational transition frequencies of Dimer 6.

| $J'$ | $K_a'$ | $K_c'$ | $J''$ | $K_a''$ | $K_c''$ | Obs/ MHz  | Cal/ MHz  | Obs - Cal/ MHz |
|------|--------|--------|-------|---------|---------|-----------|-----------|----------------|
| 10   | 2      | 8      | 10    | 1       | 10      | 3030.9900 | 3030.9903 | -0.0003        |
| 4    | 1      | 3      | 3     | 0       | 3       | 3035.0340 | 3035.0281 | 0.0059         |
| 9    | 0      | 9      | 8     | 1       | 7       | 3575.4220 | 3575.4261 | -0.0041        |
| 5    | 1      | 4      | 4     | 0       | 4       | 3581.2150 | 3581.2176 | -0.0026        |
| 2    | 2      | 0      | 1     | 1       | 0       | 3743.3520 | 3743.3587 | -0.0067        |
| 2    | 2      | 1      | 1     | 1       | 1       | 3753.4000 | 3753.3911 | 0.0089         |
| 10   | 0      | 10     | 9     | 1       | 8       | 4039.0140 | 4039.0124 | 0.0016         |
| 6    | 1      | 5      | 5     | 0       | 5       | 4132.9890 | 4132.9864 | 0.0026         |



|    |   |    |    |   |    |           |           |         |
|----|---|----|----|---|----|-----------|-----------|---------|
| 3  | 2 | 2  | 2  | 1 | 2  | 4283.9500 | 4283.9547 | -0.0047 |
| 12 | 3 | 10 | 12 | 2 | 10 | 4452.8210 | 4452.8307 | -0.0097 |
| 10 | 3 | 8  | 10 | 2 | 8  | 4482.6680 | 4482.6642 | 0.0038  |
| 9  | 3 | 7  | 9  | 2 | 7  | 4492.5210 | 4492.5113 | 0.0097  |
| 8  | 3 | 6  | 8  | 2 | 6  | 4499.7000 | 4499.7033 | -0.0033 |
| 7  | 3 | 5  | 7  | 2 | 5  | 4504.7520 | 4504.7484 | 0.0036  |
| 6  | 3 | 4  | 6  | 2 | 4  | 4508.1070 | 4508.1127 | -0.0057 |
| 5  | 3 | 3  | 5  | 2 | 3  | 4510.2210 | 4510.2122 | 0.0088  |
| 4  | 3 | 2  | 4  | 2 | 2  | 4511.4010 | 4511.4078 | -0.0068 |
| 3  | 3 | 0  | 3  | 2 | 1  | 4511.9950 | 4512.0019 | -0.0069 |
| 3  | 3 | 0  | 3  | 2 | 2  | 4512.4240 | 4512.4272 | -0.0032 |
| 4  | 3 | 1  | 4  | 2 | 3  | 4512.6890 | 4512.6865 | 0.0025  |
| 5  | 3 | 2  | 5  | 2 | 4  | 4513.2030 | 4513.1996 | 0.0034  |
| 6  | 3 | 3  | 6  | 2 | 5  | 4514.1000 | 4514.0951 | 0.0049  |
| 7  | 3 | 4  | 7  | 2 | 6  | 4515.5260 | 4515.5295 | -0.0035 |
| 8  | 3 | 5  | 8  | 2 | 7  | 4517.6990 | 4517.6890 | 0.0100  |
| 9  | 3 | 6  | 9  | 2 | 8  | 4520.7960 | 4520.7905 | 0.0055  |
| 10 | 3 | 7  | 10 | 2 | 9  | 4525.0790 | 4525.0839 | -0.0049 |
| 11 | 3 | 8  | 11 | 2 | 10 | 4530.8560 | 4530.8536 | 0.0024  |
| 7  | 1 | 6  | 6  | 0 | 6  | 4690.6120 | 4690.6180 | -0.0060 |
| 4  | 2 | 2  | 3  | 1 | 2  | 4760.1280 | 4760.1324 | -0.0044 |
| 4  | 2 | 3  | 3  | 1 | 3  | 4819.5550 | 4819.5599 | -0.0049 |
| 8  | 1 | 7  | 7  | 0 | 7  | 5254.4470 | 5254.4494 | -0.0024 |
| 5  | 2 | 3  | 4  | 1 | 3  | 5262.0200 | 5262.0173 | 0.0027  |
| 5  | 2 | 4  | 4  | 1 | 4  | 5360.2040 | 5360.2101 | -0.0061 |
| 6  | 2 | 4  | 5  | 1 | 4  | 5760.1250 | 5760.1190 | 0.0060  |
| 6  | 2 | 5  | 5  | 1 | 5  | 5905.9170 | 5905.9146 | 0.0024  |
| 7  | 2 | 5  | 6  | 1 | 5  | 6254.9680 | 6254.9634 | 0.0046  |

**Table S5.** Rotational transition frequencies of Dimer **9**.

| $J'$ | $K_a'$ | $K_c'$ | $J''$ | $K_a''$ | $K_c''$ | Obs/ MHz  | Cal/ MHz  | Obs - Cal/ MHz |
|------|--------|--------|-------|---------|---------|-----------|-----------|----------------|
| 5    | 0      | 5      | 4     | 0       | 4       | 2475.5870 | 2475.5975 | -0.0105        |
| 5    | 4      | 2      | 4     | 4       | 1       | 2493.6850 | 2493.6839 | 0.0011         |
| 5    | 4      | 1      | 4     | 4       | 0       | 2494.4540 | 2494.4649 | -0.0109        |
| 5    | 3      | 3      | 4     | 3       | 2       | 2495.2890 | 2495.3034 | -0.0144        |
| 5    | 3      | 2      | 4     | 3       | 1       | 2513.0970 | 2513.0981 | -0.0011        |
| 5    | 2      | 3      | 4     | 2       | 2       | 2970.5730 | 2970.5732 | -0.0002        |
| 5    | 1      | 4      | 4     | 1       | 3       | 2991.9360 | 2991.9306 | 0.0054         |
| 4    | 1      | 4      | 3     | 0       | 3       | 2993.2590 | 2993.2515 | 0.0075         |

|    |   |    |    |   |    |           |           |         |
|----|---|----|----|---|----|-----------|-----------|---------|
| 11 | 2 | 10 | 11 | 1 | 11 | 2994.7160 | 2994.7183 | -0.0023 |
| 7  | 0 | 7  | 6  | 1 | 6  | 3015.5740 | 3015.5719 | 0.0021  |
| 6  | 1 | 6  | 5  | 1 | 5  | 3465.4710 | 3465.4717 | -0.0007 |
| 6  | 0 | 6  | 5  | 0 | 5  | 3489.9140 | 3489.9113 | 0.0027  |
| 6  | 2 | 5  | 5  | 2 | 4  | 3491.9820 | 3491.9800 | 0.0020  |
| 6  | 5 | 1  | 5  | 5 | 0  | 3494.3220 | 3494.3251 | -0.0031 |
| 6  | 5 | 2  | 5  | 5 | 1  | 3517.9500 | 3517.9647 | -0.0147 |
| 6  | 4 | 2  | 5  | 4 | 1  | 3960.2810 | 3960.2813 | -0.0003 |
| 6  | 4 | 3  | 5  | 4 | 2  | 3987.6140 | 3987.5832 | 0.0308  |
| 6  | 3 | 4  | 5  | 3 | 3  | 3990.6430 | 3990.6409 | 0.0021  |
| 6  | 3 | 3  | 5  | 3 | 2  | 4020.2640 | 4020.2619 | 0.0021  |
| 6  | 2 | 4  | 5  | 2 | 3  | 4454.9900 | 4454.9907 | -0.0007 |
| 6  | 1 | 5  | 5  | 1 | 4  | 4484.9070 | 4484.9050 | 0.0020  |
| 17 | 2 | 16 | 17 | 1 | 17 | 4489.2260 | 4489.2244 | 0.0016  |
| 5  | 1 | 5  | 4  | 0 | 4  | 4494.2380 | 4494.2345 | 0.0035  |
| 8  | 0 | 8  | 7  | 1 | 7  | 4522.4510 | 4522.4483 | 0.0027  |
| 7  | 1 | 7  | 6  | 1 | 6  | 4949.5930 | 4949.5891 | 0.0039  |
| 7  | 0 | 7  | 6  | 0 | 6  | 4981.8330 | 4981.8378 | -0.0048 |
| 7  | 2 | 6  | 6  | 2 | 5  | 4987.7280 | 4987.7208 | 0.0072  |
| 7  | 6 | 2  | 6  | 6 | 1  | 4994.5960 | 4994.5925 | 0.0035  |
| 7  | 6 | 1  | 6  | 6 | 0  | 5024.5070 | 5024.5082 | -0.0012 |
| 7  | 5 | 2  | 6  | 5 | 1  | 5444.0630 | 5444.0663 | -0.0033 |
| 7  | 5 | 3  | 6  | 5 | 2  | 5478.3400 | 5478.3456 | -0.0056 |
| 7  | 4 | 3  | 6  | 4 | 2  | 5486.1210 | 5486.1206 | 0.0004  |
| 7  | 4 | 4  | 6  | 4 | 3  | 5488.7940 | 5488.8022 | -0.0082 |
| 7  | 3 | 5  | 6  | 3 | 4  | 5488.9950 | 5488.9908 | 0.0042  |
| 7  | 3 | 4  | 6  | 3 | 3  | 5526.4250 | 5526.4251 | -0.0001 |
| 7  | 2 | 5  | 6  | 2 | 4  | 5938.4180 | 5938.4129 | 0.0051  |
| 7  | 1 | 6  | 6  | 1 | 5  | 5974.3940 | 5974.3962 | -0.0022 |
| 6  | 1 | 6  | 5  | 0 | 5  | 5996.2250 | 5996.2318 | -0.0068 |
| 9  | 0 | 9  | 8  | 1 | 8  | 6028.1870 | 6028.1816 | 0.0054  |

Table S6. Rotational transition frequencies of Dimer 14.

| $J'$ | $K_a'$ | $K_c'$ | $J''$ | $K_a''$ | $K_c''$ | Obs/ MHz  | Cal/ MHz  | Obs - Cal/ MHz |
|------|--------|--------|-------|---------|---------|-----------|-----------|----------------|
| 7    | 1      | 7      | 6     | 1       | 6       | 2170.7860 | 2170.7866 | -0.0006        |
| 7    | 0      | 7      | 6     | 0       | 6       | 2187.9800 | 2187.9771 | 0.0029         |
| 7    | 2      | 6      | 6     | 2       | 5       | 2188.6860 | 2188.6890 | -0.0030        |
| 7    | 2      | 5      | 6     | 2       | 4       | 2189.4790 | 2189.4753 | 0.0037         |
| 7    | 1      | 6      | 6     | 1       | 5       | 2206.3870 | 2206.3888 | -0.0018        |
| 8    | 1      | 8      | 7     | 1       | 7       | 2480.8200 | 2480.8198 | 0.0002         |

|    |   |    |    |   |    |           |           |         |
|----|---|----|----|---|----|-----------|-----------|---------|
| 8  | 0 | 8  | 7  | 0 | 7  | 2500.2530 | 2500.2533 | -0.0003 |
| 8  | 2 | 7  | 7  | 2 | 6  | 2501.3060 | 2501.3004 | 0.0056  |
| 8  | 2 | 6  | 7  | 2 | 5  | 2502.4830 | 2502.4794 | 0.0036  |
| 8  | 1 | 7  | 7  | 1 | 6  | 2521.5010 | 2521.5028 | -0.0018 |
| 4  | 1 | 4  | 3  | 0 | 3  | 2606.8120 | 2606.8025 | 0.0095  |
| 4  | 1 | 3  | 3  | 0 | 3  | 2657.6690 | 2657.6753 | -0.0063 |
| 9  | 1 | 9  | 8  | 1 | 8  | 2790.8220 | 2790.8217 | 0.0003  |
| 9  | 0 | 9  | 8  | 0 | 8  | 2812.4130 | 2812.4132 | -0.0002 |
| 9  | 2 | 8  | 8  | 2 | 7  | 2813.8920 | 2813.8885 | 0.0035  |
| 9  | 2 | 7  | 8  | 2 | 6  | 2815.5710 | 2815.5718 | -0.0008 |
| 9  | 1 | 8  | 8  | 1 | 7  | 2836.5840 | 2836.5825 | 0.0015  |
| 5  | 1 | 5  | 4  | 0 | 4  | 2906.8480 | 2906.8499 | -0.0019 |
| 5  | 1 | 4  | 4  | 0 | 4  | 2983.1580 | 2983.1571 | 0.0009  |
| 10 | 1 | 10 | 9  | 1 | 9  | 3100.7900 | 3100.7889 | 0.0011  |
| 10 | 0 | 10 | 9  | 0 | 9  | 3124.4410 | 3124.4427 | -0.0017 |
| 10 | 2 | 9  | 9  | 2 | 8  | 3126.4510 | 3126.4502 | 0.0008  |
| 10 | 2 | 8  | 9  | 2 | 7  | 3128.7630 | 3128.7630 | 0.0000  |
| 10 | 1 | 9  | 9  | 1 | 8  | 3151.6210 | 3151.6233 | -0.0023 |
| 6  | 1 | 6  | 5  | 0 | 5  | 3204.4420 | 3204.4428 | -0.0008 |
| 6  | 1 | 5  | 5  | 0 | 5  | 3311.2650 | 3311.2691 | -0.0041 |
| 11 | 1 | 11 | 10 | 1 | 10 | 3410.7170 | 3410.7178 | -0.0008 |
| 11 | 0 | 11 | 10 | 0 | 10 | 3436.3270 | 3436.3281 | -0.0011 |
| 11 | 2 | 10 | 10 | 2 | 9  | 3438.9820 | 3438.9829 | -0.0009 |
| 11 | 2 | 9  | 10 | 2 | 8  | 3442.0630 | 3442.0634 | -0.0004 |
| 11 | 1 | 10 | 10 | 1 | 9  | 3466.6210 | 3466.6207 | 0.0003  |
| 7  | 1 | 7  | 6  | 0 | 6  | 3499.6270 | 3499.6306 | -0.0036 |
| 15 | 0 | 15 | 14 | 1 | 14 | 3548.1600 | 3548.1646 | -0.0046 |
| 7  | 1 | 6  | 6  | 0 | 6  | 3642.0580 | 3642.0590 | -0.0010 |
| 12 | 1 | 12 | 11 | 1 | 11 | 3720.6060 | 3720.6052 | 0.0008  |
| 12 | 0 | 12 | 11 | 0 | 11 | 3748.0530 | 3748.0559 | -0.0029 |
| 12 | 2 | 11 | 11 | 2 | 10 | 3751.4840 | 3751.4834 | 0.0006  |
| 12 | 2 | 10 | 11 | 2 | 9  | 3755.4850 | 3755.4828 | 0.0022  |
| 17 | 2 | 16 | 17 | 1 | 16 | 3761.1230 | 3761.1150 | 0.0080  |
| 9  | 3 | 7  | 10 | 2 | 8  | 3774.9970 | 3774.9887 | 0.0083  |
| 9  | 3 | 6  | 10 | 2 | 8  | 3774.9970 | 3775.0111 | -0.0141 |
| 12 | 1 | 11 | 11 | 1 | 10 | 3781.5700 | 3781.5697 | 0.0003  |
| 9  | 3 | 7  | 10 | 2 | 9  | 3781.9440 | 3781.9334 | 0.0106  |
| 9  | 3 | 6  | 10 | 2 | 9  | 3781.9440 | 3781.9558 | -0.0118 |
| 18 | 2 | 16 | 18 | 1 | 17 | 3784.0480 | 3784.0514 | -0.0034 |
| 17 | 2 | 15 | 17 | 1 | 16 | 3815.0270 | 3815.0356 | -0.0086 |

|    |   |    |    |   |    |           |           |         |
|----|---|----|----|---|----|-----------|-----------|---------|
| 15 | 2 | 14 | 15 | 1 | 14 | 3842.7980 | 3842.7970 | 0.0010  |
| 16 | 2 | 14 | 16 | 1 | 15 | 3845.7750 | 3845.7751 | -0.0001 |
| 15 | 2 | 13 | 15 | 1 | 14 | 3876.0260 | 3876.0263 | -0.0003 |
| 14 | 2 | 13 | 14 | 1 | 13 | 3880.1070 | 3880.1100 | -0.0030 |
| 16 | 0 | 16 | 15 | 1 | 15 | 3891.3230 | 3891.3210 | 0.0020  |
| 14 | 2 | 12 | 14 | 1 | 13 | 3905.5480 | 3905.5560 | -0.0080 |
| 13 | 2 | 12 | 13 | 1 | 12 | 3915.0370 | 3915.0361 | 0.0009  |
| 13 | 2 | 11 | 13 | 1 | 12 | 3934.1500 | 3934.1426 | 0.0074  |
| 12 | 2 | 11 | 12 | 1 | 11 | 3947.5540 | 3947.5526 | 0.0014  |
| 12 | 2 | 10 | 12 | 1 | 11 | 3961.5750 | 3961.5773 | -0.0023 |
| 8  | 1 | 7  | 7  | 0 | 7  | 3975.5830 | 3975.5847 | -0.0017 |
| 11 | 2 | 10 | 11 | 1 | 10 | 3977.6510 | 3977.6389 | 0.0121  |
| 10 | 2 | 9  | 10 | 1 | 9  | 4005.2770 | 4005.2768 | 0.0002  |
| 10 | 2 | 8  | 10 | 1 | 9  | 4012.2230 | 4012.2215 | 0.0015  |
| 13 | 1 | 13 | 12 | 1 | 12 | 4030.4470 | 4030.4477 | -0.0007 |
| 9  | 2 | 7  | 9  | 1 | 8  | 4035.0830 | 4035.0819 | 0.0011  |
| 8  | 2 | 7  | 8  | 1 | 7  | 4053.1470 | 4053.1439 | 0.0031  |
| 8  | 2 | 6  | 8  | 1 | 7  | 4056.0920 | 4056.0926 | -0.0006 |
| 13 | 0 | 13 | 12 | 0 | 12 | 4059.6143 | 4059.6132 | 0.0012  |
| 13 | 2 | 12 | 12 | 2 | 11 | 4063.9524 | 4063.9490 | 0.0034  |
| 13 | 2 | 11 | 12 | 2 | 10 | 4069.0320 | 4069.0309 | 0.0011  |
| 7  | 2 | 6  | 7  | 1 | 6  | 4073.3460 | 4073.3463 | -0.0003 |
| 7  | 2 | 5  | 7  | 1 | 6  | 4075.1170 | 4075.1159 | 0.0011  |
| 9  | 1 | 9  | 8  | 0 | 8  | 4083.0380 | 4083.0417 | -0.0037 |
| 8  | 3 | 5  | 9  | 2 | 7  | 4089.3260 | 4089.3367 | -0.0107 |
| 8  | 3 | 6  | 9  | 2 | 7  | 4089.3260 | 4089.3255 | 0.0005  |
| 6  | 2 | 5  | 6  | 1 | 5  | 4091.0390 | 4091.0461 | -0.0071 |
| 6  | 2 | 4  | 6  | 1 | 5  | 4092.0300 | 4092.0294 | 0.0006  |
| 8  | 3 | 6  | 9  | 2 | 8  | 4093.9640 | 4093.9574 | 0.0066  |
| 8  | 3 | 5  | 9  | 2 | 8  | 4093.9640 | 4093.9686 | -0.0046 |
| 13 | 1 | 12 | 12 | 1 | 11 | 4096.4650 | 4096.4655 | -0.0005 |
| 5  | 2 | 4  | 5  | 1 | 4  | 4106.2380 | 4106.2340 | 0.0040  |
| 5  | 2 | 3  | 5  | 1 | 4  | 4106.7250 | 4106.7258 | -0.0008 |
| 4  | 2 | 3  | 4  | 1 | 3  | 4118.8990 | 4118.9023 | -0.0033 |
| 4  | 2 | 2  | 4  | 1 | 3  | 4119.1100 | 4119.1130 | -0.0030 |
| 2  | 2 | 1  | 2  | 1 | 1  | 4136.6590 | 4136.6554 | 0.0036  |
| 2  | 2 | 0  | 2  | 1 | 1  | 4136.6610 | 4136.6694 | -0.0084 |
| 2  | 2 | 1  | 2  | 1 | 2  | 4151.9230 | 4151.9177 | 0.0053  |
| 2  | 2 | 0  | 2  | 1 | 2  | 4151.9230 | 4151.9318 | -0.0088 |
| 4  | 2 | 3  | 4  | 1 | 4  | 4169.7760 | 4169.7751 | 0.0009  |

|    |   |    |    |   |    |           |           |         |
|----|---|----|----|---|----|-----------|-----------|---------|
| 4  | 2 | 2  | 4  | 1 | 4  | 4169.9830 | 4169.9859 | -0.0029 |
| 5  | 2 | 3  | 5  | 1 | 5  | 4183.0330 | 4183.0330 | 0.0000  |
| 6  | 2 | 5  | 6  | 1 | 6  | 4197.8720 | 4197.8724 | -0.0004 |
| 6  | 2 | 4  | 6  | 1 | 6  | 4198.8580 | 4198.8557 | 0.0023  |
| 7  | 2 | 6  | 7  | 1 | 7  | 4215.7760 | 4215.7747 | 0.0013  |
| 7  | 2 | 5  | 7  | 1 | 7  | 4217.5440 | 4217.5444 | -0.0004 |
| 8  | 2 | 7  | 8  | 1 | 8  | 4236.2550 | 4236.2554 | -0.0004 |
| 8  | 2 | 6  | 8  | 1 | 8  | 4239.2030 | 4239.2040 | -0.0010 |
| 9  | 2 | 8  | 9  | 1 | 9  | 4259.3200 | 4259.3221 | -0.0021 |
| 9  | 2 | 7  | 9  | 1 | 9  | 4263.9520 | 4263.9541 | -0.0021 |
| 10 | 2 | 9  | 10 | 1 | 10 | 4284.9860 | 4284.9835 | 0.0025  |
| 10 | 2 | 8  | 10 | 1 | 10 | 4291.9300 | 4291.9282 | 0.0018  |
| 9  | 1 | 8  | 8  | 0 | 8  | 4311.9140 | 4311.9139 | 0.0001  |
| 11 | 2 | 10 | 11 | 1 | 11 | 4313.2560 | 4313.2485 | 0.0075  |
| 11 | 2 | 9  | 11 | 1 | 11 | 4323.2760 | 4323.2737 | 0.0023  |
| 14 | 1 | 14 | 13 | 1 | 13 | 4340.2440 | 4340.2423 | 0.0017  |
| 12 | 2 | 11 | 12 | 1 | 12 | 4344.1280 | 4344.1267 | 0.0013  |
| 16 | 4 | 12 | 17 | 3 | 14 | 4350.1500 | 4350.1526 | -0.0026 |
| 16 | 4 | 13 | 17 | 3 | 14 | 4350.1500 | 4350.1483 | 0.0017  |
| 16 | 4 | 13 | 17 | 3 | 15 | 4351.0960 | 4351.0852 | 0.0108  |
| 16 | 4 | 12 | 17 | 3 | 15 | 4351.0960 | 4351.0896 | 0.0064  |
| 14 | 0 | 14 | 13 | 0 | 13 | 4370.9870 | 4370.9875 | -0.0005 |
| 10 | 1 | 10 | 9  | 0 | 9  | 4371.4150 | 4371.4174 | -0.0024 |
| 14 | 2 | 13 | 13 | 2 | 12 | 4376.3780 | 4376.3767 | 0.0013  |
| 13 | 2 | 12 | 13 | 1 | 13 | 4377.6310 | 4377.6280 | 0.0030  |
| 14 | 2 | 12 | 13 | 2 | 11 | 4382.7180 | 4382.7162 | 0.0018  |
| 13 | 2 | 11 | 13 | 1 | 13 | 4396.7320 | 4396.7345 | -0.0025 |
| 7  | 3 | 5  | 8  | 2 | 6  | 4403.2090 | 4403.2098 | -0.0008 |
| 7  | 3 | 4  | 8  | 2 | 6  | 4403.2090 | 4403.2148 | -0.0058 |
| 7  | 3 | 5  | 8  | 2 | 7  | 4406.1580 | 4406.1584 | -0.0004 |
| 7  | 3 | 4  | 8  | 2 | 7  | 4406.1580 | 4406.1635 | -0.0055 |
| 14 | 1 | 13 | 13 | 1 | 12 | 4411.3020 | 4411.3029 | -0.0009 |
| 14 | 2 | 13 | 14 | 1 | 14 | 4413.7640 | 4413.7624 | 0.0016  |
| 14 | 2 | 12 | 14 | 1 | 14 | 4439.2120 | 4439.2084 | 0.0036  |
| 15 | 2 | 14 | 15 | 1 | 15 | 4452.5400 | 4452.5400 | 0.0000  |
| 15 | 2 | 13 | 15 | 1 | 15 | 4485.7740 | 4485.7693 | 0.0047  |
| 16 | 2 | 15 | 16 | 1 | 16 | 4493.9740 | 4493.9709 | 0.0031  |
| 16 | 2 | 14 | 16 | 1 | 16 | 4536.6170 | 4536.6234 | -0.0064 |
| 17 | 2 | 16 | 17 | 1 | 17 | 4538.0660 | 4538.0647 | 0.0013  |
| 18 | 0 | 18 | 17 | 1 | 17 | 4580.6790 | 4580.6775 | 0.0015  |

|    |   |    |    |   |    |           |           |         |
|----|---|----|----|---|----|-----------|-----------|---------|
| 18 | 2 | 17 | 18 | 1 | 18 | 4584.8340 | 4584.8309 | 0.0031  |
| 17 | 2 | 15 | 17 | 1 | 17 | 4591.9780 | 4591.9853 | -0.0073 |
| 15 | 1 | 15 | 14 | 1 | 14 | 4649.9860 | 4649.9861 | -0.0001 |
| 10 | 1 | 9  | 9  | 0 | 9  | 4651.1250 | 4651.1241 | 0.0009  |
| 11 | 1 | 11 | 10 | 0 | 10 | 4657.6940 | 4657.6925 | 0.0015  |
| 15 | 0 | 15 | 14 | 0 | 14 | 4682.1670 | 4682.1675 | -0.0005 |
| 15 | 2 | 14 | 14 | 2 | 13 | 4688.7630 | 4688.7637 | -0.0007 |
| 15 | 3 | 13 | 14 | 3 | 12 | 4691.0640 | 4691.0673 | -0.0033 |
| 15 | 3 | 12 | 14 | 3 | 11 | 4691.2220 | 4691.2169 | 0.0051  |
| 15 | 2 | 13 | 14 | 2 | 12 | 4696.5460 | 4696.5470 | -0.0010 |
| 6  | 3 | 4  | 7  | 2 | 5  | 4716.7360 | 4716.7320 | 0.0040  |
| 6  | 3 | 3  | 7  | 2 | 5  | 4716.7360 | 4716.7340 | 0.0020  |
| 6  | 3 | 3  | 7  | 2 | 6  | 4718.5000 | 4718.5037 | -0.0037 |
| 6  | 3 | 4  | 7  | 2 | 6  | 4718.5000 | 4718.5017 | -0.0017 |
| 15 | 1 | 14 | 14 | 1 | 13 | 4726.0790 | 4726.0767 | 0.0023  |
| 2  | 2 | 1  | 1  | 1 | 0  | 4767.1200 | 4767.1150 | 0.0050  |
| 2  | 2 | 0  | 1  | 1 | 0  | 4767.1210 | 4767.1290 | -0.0080 |
| 2  | 2 | 1  | 1  | 1 | 1  | 4772.2130 | 4772.2025 | 0.0105  |
| 2  | 2 | 0  | 1  | 1 | 1  | 4772.2130 | 4772.2165 | -0.0035 |
| 12 | 1 | 12 | 11 | 0 | 11 | 4941.9670 | 4941.9695 | -0.0025 |
| 16 | 1 | 16 | 15 | 1 | 15 | 4959.6780 | 4959.6763 | 0.0017  |
| 16 | 0 | 16 | 15 | 0 | 15 | 4993.1420 | 4993.1425 | -0.0005 |
| 16 | 2 | 15 | 15 | 2 | 14 | 5001.1080 | 5001.1072 | 0.0008  |
| 16 | 3 | 14 | 15 | 3 | 13 | 5003.8780 | 5003.8784 | -0.0004 |
| 16 | 3 | 13 | 15 | 3 | 12 | 5004.0920 | 5004.0854 | 0.0066  |
| 16 | 2 | 14 | 15 | 2 | 13 | 5010.5300 | 5010.5303 | -0.0003 |
| 3  | 2 | 2  | 2  | 1 | 2  | 5089.9877 | 5089.9858 | 0.0019  |
| 3  | 2 | 1  | 2  | 1 | 2  | 5090.0542 | 5090.0560 | -0.0018 |
| 13 | 1 | 13 | 12 | 0 | 12 | 5224.3580 | 5224.3613 | -0.0033 |
| 17 | 1 | 17 | 16 | 1 | 16 | 5269.3100 | 5269.3103 | -0.0003 |
| 17 | 0 | 17 | 16 | 0 | 16 | 5303.9010 | 5303.9028 | -0.0018 |
| 17 | 2 | 16 | 16 | 2 | 15 | 5313.4030 | 5313.4041 | -0.0011 |
| 17 | 3 | 15 | 16 | 3 | 14 | 5316.6960 | 5316.7003 | -0.0043 |
| 17 | 3 | 14 | 16 | 3 | 13 | 5316.9770 | 5316.9810 | -0.0040 |
| 17 | 2 | 15 | 16 | 2 | 14 | 5324.6700 | 5324.6722 | -0.0022 |
| 12 | 1 | 11 | 11 | 0 | 11 | 5338.5420 | 5338.5436 | -0.0016 |
| 17 | 1 | 16 | 16 | 1 | 15 | 5355.4120 | 5355.4118 | 0.0002  |
| 4  | 2 | 3  | 3  | 1 | 2  | 5379.7910 | 5379.7881 | 0.0029  |
| 4  | 2 | 2  | 3  | 1 | 2  | 5379.9910 | 5379.9989 | -0.0079 |
| 4  | 2 | 3  | 3  | 1 | 3  | 5410.3130 | 5410.3124 | 0.0006  |

|    |   |    |    |   |    |           |           |         |
|----|---|----|----|---|----|-----------|-----------|---------|
| 4  | 2 | 2  | 3  | 1 | 3  | 5410.5240 | 5410.5232 | 0.0008  |
| 14 | 1 | 14 | 13 | 0 | 13 | 5504.9940 | 5504.9905 | 0.0035  |
| 18 | 1 | 18 | 17 | 1 | 17 | 5578.8870 | 5578.8857 | 0.0013  |
| 18 | 0 | 18 | 17 | 0 | 17 | 5614.4446 | 5614.4403 | 0.0043  |
| 18 | 2 | 17 | 17 | 2 | 16 | 5625.6520 | 5625.6519 | 0.0001  |
| 18 | 3 | 16 | 17 | 3 | 15 | 5629.5340 | 5629.5324 | 0.0016  |
| 18 | 3 | 15 | 17 | 3 | 14 | 5629.9090 | 5629.9064 | 0.0026  |
| 18 | 2 | 16 | 17 | 2 | 15 | 5638.9740 | 5638.9775 | -0.0035 |
| 18 | 1 | 17 | 17 | 1 | 16 | 5669.9620 | 5669.9617 | 0.0003  |
| 5  | 2 | 4  | 4  | 1 | 3  | 5682.3000 | 5682.3100 | -0.0100 |
| 5  | 2 | 3  | 4  | 1 | 3  | 5682.8100 | 5682.8017 | 0.0083  |
| 13 | 1 | 12 | 12 | 0 | 12 | 5686.9450 | 5686.9532 | -0.0082 |
| 5  | 2 | 4  | 4  | 1 | 4  | 5733.1850 | 5733.1828 | 0.0022  |
| 5  | 2 | 3  | 4  | 1 | 4  | 5733.6730 | 5733.6746 | -0.0016 |
| 15 | 1 | 15 | 14 | 0 | 14 | 5783.9910 | 5783.9890 | 0.0020  |
| 19 | 1 | 19 | 18 | 1 | 18 | 5888.3980 | 5888.4001 | -0.0021 |
| 11 | 4 | 7  | 12 | 3 | 9  | 5915.9910 | 5915.9963 | -0.0053 |
| 11 | 4 | 8  | 12 | 3 | 9  | 5915.9910 | 5915.9961 | -0.0051 |
| 11 | 4 | 8  | 12 | 3 | 10 | 5916.1150 | 5916.1173 | -0.0023 |
| 11 | 4 | 7  | 12 | 3 | 10 | 5916.1150 | 5916.1176 | -0.0026 |
| 19 | 0 | 19 | 18 | 0 | 18 | 5924.7490 | 5924.7480 | 0.0010  |
| 19 | 2 | 18 | 18 | 2 | 17 | 5937.8500 | 5937.8475 | 0.0025  |
| 19 | 3 | 16 | 18 | 3 | 15 | 5942.8610 | 5942.8646 | -0.0036 |
| 19 | 2 | 17 | 18 | 2 | 16 | 5953.4490 | 5953.4493 | -0.0003 |
| 6  | 2 | 5  | 5  | 1 | 4  | 5982.2890 | 5982.2912 | -0.0022 |
| 6  | 2 | 4  | 5  | 1 | 4  | 5983.2820 | 5983.2745 | 0.0075  |
| 19 | 1 | 18 | 18 | 1 | 17 | 5984.4240 | 5984.4252 | -0.0012 |
| 14 | 1 | 13 | 13 | 0 | 13 | 6038.6420 | 6038.6429 | -0.0009 |
| 6  | 2 | 5  | 5  | 1 | 5  | 6058.6030 | 6058.5983 | 0.0047  |
| 6  | 2 | 4  | 5  | 1 | 5  | 6059.5800 | 6059.5817 | -0.0017 |
| 16 | 1 | 16 | 15 | 0 | 15 | 6061.4960 | 6061.4978 | -0.0018 |
| 20 | 1 | 20 | 19 | 1 | 19 | 6197.8550 | 6197.8516 | 0.0034  |
| 20 | 0 | 20 | 19 | 0 | 19 | 6234.8220 | 6234.8208 | 0.0012  |
| 20 | 3 | 18 | 19 | 3 | 17 | 6255.2290 | 6255.2252 | 0.0038  |
| 20 | 3 | 17 | 19 | 3 | 16 | 6255.8560 | 6255.8589 | -0.0029 |
| 20 | 2 | 18 | 19 | 2 | 17 | 6268.0920 | 6268.0896 | 0.0024  |
| 7  | 2 | 6  | 6  | 1 | 5  | 6279.7380 | 6279.7351 | 0.0029  |
| 7  | 2 | 5  | 6  | 1 | 5  | 6281.5060 | 6281.5047 | 0.0013  |
| 20 | 1 | 19 | 19 | 1 | 18 | 6298.7990 | 6298.7963 | 0.0027  |
| 17 | 1 | 17 | 16 | 0 | 16 | 6337.6620 | 6337.6656 | -0.0036 |

|    |   |    |    |   |    |           |           |         |
|----|---|----|----|---|----|-----------|-----------|---------|
| 7  | 2 | 6  | 6  | 1 | 6  | 6386.5600 | 6386.5613 | -0.0013 |
| 7  | 2 | 5  | 6  | 1 | 6  | 6388.3350 | 6388.3310 | 0.0040  |
| 15 | 1 | 14 | 14 | 0 | 14 | 6393.7320 | 6393.7321 | -0.0001 |
| 21 | 1 | 21 | 20 | 1 | 20 | 6507.2390 | 6507.2383 | 0.0007  |
| 21 | 0 | 21 | 20 | 0 | 20 | 6544.6540 | 6544.6551 | -0.0011 |
| 21 | 2 | 20 | 20 | 2 | 19 | 6562.0680 | 6562.0713 | -0.0033 |
| 21 | 2 | 19 | 20 | 2 | 18 | 6582.8970 | 6582.8981 | -0.0011 |
| 21 | 1 | 20 | 20 | 1 | 19 | 6613.0720 | 6613.0684 | 0.0036  |

**Table S7.** Comparison of the experimental and calculated<sup>a</sup> rotational constants.

| Rotational constants | Percentage error <sup>b</sup> |         |         |         |          |
|----------------------|-------------------------------|---------|---------|---------|----------|
|                      | Dimer 1                       | Dimer 3 | Dimer 6 | Dimer 9 | Dimer 14 |
| A                    | -0.5                          | 1.1     | -0.4    | 1.6     | -3.4     |
| B                    | -0.7                          | -2.0    | 0.0     | -2.0    | -0.1     |
| C                    | -1.5                          | -1.6    | -0.2    | -2.2    | -0.6     |

<sup>a</sup> At the B3LYP-D3BJ/def2-TZVP level.

<sup>b</sup> Percentage Error = 100% x (Exp. – Calc.) / Exp.

**Table S8.** Calculated centrifugal distortion constants of the five observed binary TFP conformers at the B3LYP-D3BJ/def2-TZVP level of theory.

|                | <b>1 TFPG-e</b><br><b>TFPG-g+</b> | <b>3 TFPG-g+</b><br><b>TFPG+g-</b> | <b>6 TFPG-g-</b><br><b>TFPG+g-</b> | <b>9 TFPG-g+</b><br><b>TFPTt</b> | <b>14 TFPTt</b><br><b>TFPG-g+</b> |
|----------------|-----------------------------------|------------------------------------|------------------------------------|----------------------------------|-----------------------------------|
| $D_K$ / kHz    | 0.513748                          | 0.605328                           | 1.781720                           | 2.547081                         | 5.22448                           |
| $D_{JK}$ / kHz | 0.038212                          | -0.172014                          | -0.539706                          | -0.683106                        | -0.33920                          |
| $D_J$ / kHz    | 0.044025                          | 0.114074                           | 0.080929                           | 0.091797                         | 0.019248                          |
| $d_1$ / kHz    | -0.004392                         | -0.021487                          | -0.005360                          | 0.003424                         | -0.001240                         |
| $d_2$ / kHz    | -0.000241                         | -0.001789                          | 0.000101                           | 0.000018                         | 0.000015                          |



**Table S9.** The counterpoise corrected interaction energy and deformation energy (in kJ mol<sup>-1</sup>) of the selective low-energy binary TFP conformers at the B3LYP-D3BJ/def2-TZVP level of theory.<sup>a</sup>

| Binary TFP conformers <sup>b</sup> | $\Delta E_{\text{def}}$<br>H acceptor (A) | $\Delta E_{\text{def}}$<br>H donor (D) | $\Delta E^{\text{int}}$ |
|------------------------------------|-------------------------------------------|----------------------------------------|-------------------------|
| <b>1</b> TFPG-eTFPG-g+             | 0.6                                       | 9.0                                    | -40.0                   |
| <b>2</b> TFPG-g+TFPG+g-            | 4.7                                       | 0.4                                    | -35.3                   |
| <b>3</b> TFPG-g+TFPG+g-            | 0.4                                       | 2.8                                    | -33.6                   |
| <b>4</b> TFPG-g+TFPG-g+            | 0.4                                       | 2.8                                    | -32.8                   |
| <b>5</b> TFPG-g+TFPG+g-            | 6.0                                       | 0.9                                    | -35.8                   |
| <b>6</b> TFPG-g-TFPG+g-            | 0.6                                       | 0.6                                    | -39.1                   |
| <b>7</b> TFPG-g+TFPG-g+            | 3.0                                       | 0.8                                    | -32.2                   |
| <b>8</b> TFPG-g+TFPG+g-            | 3.9                                       | 0.2                                    | -32.6                   |
| <b>9</b> TFPG-g+TFPTt              | 3.1                                       | 0.4                                    | -34.4                   |
| <b>10</b> TFPG-g+TFPG-g+           | 5.3                                       | 0.3                                    | -34.0                   |
| <b>11</b> TFPG-tTFPG+g-            | 1.0                                       | 0.8                                    | -35.9                   |
| <b>12</b> TFPG-g+TFPTt             | 5.4                                       | 0.5                                    | -35.7                   |
| <b>13</b> TFPG-g-TFPG-g-           | 0.6                                       | 0.6                                    | -36.2                   |
| <b>14</b> TFPTtTFPG-g+             | 0.4                                       | 0.5                                    | -31.3                   |
| <b>15</b> TFPG-g+TFPTg-            | 4.3                                       | 0.4                                    | -35.9                   |
| <b>16</b> TFPTg+TFPG-g+            | 1.0                                       | 0.5                                    | -33.0                   |
| <b>17</b> TFPTg-TFPG-g+            | 0.4                                       | 0.5                                    | -32.6                   |
| <b>18</b> TFPTtTFPG-g+             | 0.3                                       | 0.7                                    | -30.6                   |
| <b>19</b> TFPTg+TFPG-g+            | 0.5                                       | 0.5                                    | -32.9                   |
| <b>20</b> TFPG-g-TFPG-g+           | 1.0                                       | 1.1                                    | -36.4                   |
| <b>43</b> TFPTtTFPTt               | 0.3                                       | 0.4                                    | -28.6                   |
| <b>54</b> TFPTg-TFPTt              | 0.4                                       | 0.4                                    | -30.3                   |
| <b>56</b> TFPTg-TFPTt              | 0.5                                       | 0.4                                    | -30.2                   |
| <b>57</b> TFPTtTFPTg-              | 0.3                                       | 0.3                                    | -29.4                   |
| <b>60</b> TFPTg-TFPTg-             | 0.4                                       | 0.4                                    | -31.3                   |

<sup>a</sup>  $\Delta E_{\text{def}} = E_{D/A}^{\text{dimer}}(DA) - E_{D/A}^{\text{monomer}}(D/A)$ ;  $E^{\text{int}} = E_{DA}^{\text{dimer}}(DA) - E_A^{\text{dimer}}(DA) - E_D^{\text{dimer}}(DA)$

Here, superscript refers to the molecular system where the calculations were performed while subscript refers to the molecule or the subunits being calculated. *D* stand for the donor fragment and *A* for the acceptor fragment, while *DA* stands for the dimer. Brackets refer to the basis used.
